# Supplementary material
Source: ML conference proceedings conference paper supplement (https://openreview.net/forum?id=GcEIvidYSw)
Supplement: supplementary_material [file attachment]

# 574 Appendices

## 575 A Implementation details of Cal-QL

576 Our algorithm, Cal-QL is illustrated in Algorithm 1. A complete implementation of the functions in  
577 python-style is provided in Appendix A.2.

### 578 A.1 Cal-QL Algorithm

579 We use  $J_Q(\theta)$  to denote the calibrated conservative regularizer for the Q network update:

$$J_Q(\theta) := \underbrace{\alpha (\mathbb{E}_{s \sim \mathcal{D}, a \sim \pi} [\max(Q_\theta(s, a), Q^\mu(s, a))] - \mathbb{E}_{s, a \sim \mathcal{D}} [Q_\theta(s, a)])}_{\text{Calibrated conservative regularizer } \mathcal{R}(\theta)} \quad (\text{A.1})$$

$$+ \frac{1}{2} \mathbb{E}_{s, a, s' \sim \mathcal{D}} [(Q_\theta(s, a) - \mathcal{B}^\pi \bar{Q}(s, a))^2]. \quad (\text{A.2})$$

---

#### Algorithm 1 Cal-QL pseudo-code

---

- 1: Initialize Q-function,  $Q_\theta$ , a policy,  $\pi_\phi$
- 2: **for** step  $t$  in  $\{1, \dots, N\}$  **do**
- 3:   Train the Q-function using the conservative regularizer  
in Eq. A.1:

$$\theta_t := \theta_{t-1} - \eta_Q \nabla_\theta J_Q(\theta) \quad (\text{A.3})$$

- 4:   Improve policy  $\pi_\phi$  with SAC-style update:

$$\phi_t := \phi_{t-1} + \eta_\pi \mathbb{E}_{s \sim \mathcal{D}, a \sim \pi_\phi(\cdot|s)} [Q_\theta(s, a) - \log \pi_\phi(a|s)] \quad (\text{A.4})$$

- 5: **end for**
- 

### 581 A.2 Python Implementation

Listing 1: Training Q networks given a batch of data

```

582 q_data = critic(batch['observations'], batch['actions'])
583
584 next_dist = actor(batch['next_observations'])
585 next_pi_actions, next_log_pis = next_dist.sample()
586
587 target_qval = target_critic(batch['observations'], next_pi_actions)
588 target_qval = batch['rewards'] + self.gamma * (1 - batch['dones']) * target_qval
589
590 td_loss = mse_loss(q_data, target_qval)
591
592 num_samples = 4
593 random_actions = uniform((num_samples, batch_size, action_dim), min=-1, max=1)
594 random_pi = 0.5 ** batch['actions'].shape[-1]
595
596 pi_actions, log_pis = actor(batch['observations'])
597
598 q_rand_is = critic(batch['observations'], random_actions) - random_pi
599 q_pi_is = critic(batch['observations'], pi_actions) - log_pis
600
601 # Cal-QL's modification
602 mc_return = batch['mc_return'].repeat(num_samples)
603 q_pi_is = max(q_pi_is, mc_return)
604
605 cat_q = concatenate([q_rand_is, q_pi_is], new_axis=True)
606 cat_q = logsumexp(cat_q, axis=0) # sum over num_samples
607 critic_loss = td_loss + ((cat_q - q_data).mean() * cql_alpha)
608
609 critic_optimizer.zero_grad()
610 critic_loss.backward()
611 critic_optimizer.step()
612

```

Listing 2: Training the policy (or the actor) given a batch of data

```

614 # return distribution of actions
615 pi_actions, log_pis = actor(batch['observations'])
616
617 # calculate q value of actor actions
618 qpi = critic(batch['observations'], actions)
619 qpi = qpi.min(axis=0)
620
621 # same objective as CQL (kumar et al.)
622 actor_loss = (log_pis * self.alpha - qpi).mean()
623
624 # optimize loss
625 actor_optimizer.zero_grad()
626 actor_loss.backward()
627 actor_optimizer.step()
628

```

## B Regret Analysis of Cal-QL

We provide a theoretical version of Cal-QL in Algorithm 2. Policy fine-tuning has been studied in different settings [60, 52, 55]. Our analysis largely adopts the settings and results in Song et al. [52], with additional changes in Assumption B.1, Assumption B.3, and Definition B.4. Note that the goal of this proof is to demonstrate that a *pessimistic functional class* (Assumption B.1) allows one to utilize the offline data efficiently, rather than providing a new analytical technique for regret analysis. See comparisons between Section B.3 and Section C.1. Note that we use  $f$  instead of  $Q_\theta$  in the main text to denote the estimated  $Q$  function for notation simplicity.

---

### Algorithm 2 Theoretical version of Cal-QL

---

- 1: **Input:** Value function class  $\mathcal{F}$ , # total iterations  $K$ , offline dataset  $\mathcal{D}_h^\nu$  of size  $m_{\text{off}}$  for  $h \in [H-1]$ .
  - 2: Initialize  $f_h^1(s, a) = 0, \forall(s, a)$ .
  - 3: **for**  $k = 1, \dots, K$  **do**
  - 4:   Let  $\pi^k$  be the greedy policy w.r.t.  $f^k$   $\triangleright$  I.e.,  $\pi_h^k(s) = \arg \max_a f_h^k(s, a)$ .
  - 5:   For each  $h$ , collect  $m_{\text{on}}$  online tuples  $\mathcal{D}_h^k \sim d_h^{\pi^k}$   $\triangleright$  online data collection
  - 6:   Set  $f_H^{k+1}(s, a) = 0, \forall(s, a)$ .
  - 7:   **for**  $h = H-1, \dots, 0$  **do**  $\triangleright$  FQI with offline and online data
  - 8:     Estimate  $f_h^{k+1}$  using **conservative** least squares on the aggregated data:  $\triangleright$  I.e., CQL regularized class  $\hat{\mathcal{C}}_h$
  - $$f_h^{k+1} \leftarrow \arg \min_{f \in \hat{\mathcal{C}}_h} \left\{ \widehat{\mathbb{E}}_{\mathcal{D}_h^\nu} \left[ f(s, a) - r - \max_{a'} f_{h+1}^{k+1}(s', a') \right]^2 + \sum_{\tau=1}^K \widehat{\mathbb{E}}_{\mathcal{D}_h^\tau} \left[ f(s, a) - r - \max_{a'} f_{h+1}^{k+1}(s', a') \right]^2 \right\} \quad (\text{B.1})$$
  - 9:      $f_h^{k+1} = \max\{f_h^{k+1}, Q_h^{\text{ref}}\}$   $\triangleright$  Set a reference policy for calibration (Definition 4.1)
  - 10:   **end for**
  - 11: **end for**
  - 12: **Output:**  $\pi^K$
- 

### B.1 Preliminaries

In this subsection, we follow most of the notations and definitions in Song et al. [52]. In particular, we consider the finite horizon cases, where the value function and  $Q$  function are defined as:

$$V_h^\pi(s) = \mathbb{E} \left[ \sum_{\tau=h}^{H-1} r_\tau | \pi, s_h = s \right] \quad (\text{B.2})$$

$$Q_h^\pi(s, a) = \mathbb{E} \left[ \sum_{\tau=h}^{H-1} r_\tau | \pi, s_h = s, a_h = a \right]. \quad (\text{B.3})$$

We also define the Bellman operator  $\mathcal{T}$  such that  $\forall f : \mathcal{S} \times \mathcal{A}$ :

$$\mathcal{T}f(s, a) = \mathbb{E}_{s,a}[R(s, a)] + \mathbb{E}_{s' \sim P(s,a)} \max_{a'} f(s', a'), \quad \forall(s, a) \in \mathcal{S} \times \mathcal{A}, \quad (\text{B.4})$$

where  $R(s, a) \in \Delta[0, 1]$  represents a stochastic reward function.

## 643 B.2 Notations

- 644 • Feature covariance matrix  $\Sigma_{k;h}$ :

$$\Sigma_{k;h} = \sum_{\tau=1}^k X_h(f^\tau)(X_h(f^\tau))^\top + \lambda I \quad (\text{B.5})$$

- 645 • Matrix Norm Zanette et al. [63]: for a matrix  $\Sigma$ , the matrix norm  $\|\mathbf{u}\|_\Sigma$  is defined as:

$$\|\mathbf{u}\|_\Sigma = \sqrt{\mathbf{u}\Sigma\mathbf{u}^\top} \quad (\text{B.6})$$

- 646 • Weighted  $\ell^2$  norm: for a given distribution  $\beta \in \Delta(\mathcal{S} \times \mathcal{A})$  and a function  $f : \mathcal{S} \times \mathcal{A} \mapsto \mathbb{R}$ ,  
647 we denote the weighted  $\ell^2$  norm as:

$$\|f\|_{2,\beta}^2 := \mathbb{E}_{(s,a) \sim \beta} f^2(s, a) \quad (\text{B.7})$$

- 648 • A stochastic reward function  $R(s, a) \in \Delta([0, 1])$
- 649 • For each offline data distribution  $\nu = \{\nu_0, \dots, \nu_{H-1}\}$ , the offline data set at time step  $h$   
650 ( $\nu_h$ ) contains data samples  $(s, a, r, s')$ , where  $(s, a) \sim \nu_h, r \in R(s, a), s' \sim P(s, a)$ .
- 651 • Given a policy  $\pi := \{\pi_0, \dots, \pi_{H-1}\}$ , where  $\pi_h : \mathcal{S} \mapsto \Delta(\mathcal{A})$ ,  $d_h^\pi \in \Delta(s, a)$  denotes the  
652 state-action occupancy induced by  $\pi$  at step  $h$ .
- 653 • We consider the value-based function approximation setting, where we are given a function  
654 class  $\mathcal{C} = \mathcal{C}_0 \times \dots \times \mathcal{C}_{H-1}$  with  $\mathcal{C}_h \subset \mathcal{S} \times \mathcal{A} \mapsto [0, V_{\max}]$ .
- 655 • A policy  $\pi^f$  is defined as the greedy policy w.r.t.  $f: \pi_h^f(s) = \arg \max_a f_h(s, a)$ . Specifi-  
656 cally, at iteration  $k$ , we use  $\pi^k$  to denote the greedy policy w.r.t.  $f^k$ .

## 657 B.3 Assumptions and Defintions

658 **Assumption B.1** (Pessimistic Realizability and Completeness). *For any policy  $\pi^e$ , we say  $\mathcal{C}_h$  is*  
659 *a pessimistic function class w.r.t.  $\pi^e$ , if for any  $h$ , we have  $Q_h^{\pi^e} \in \mathcal{C}_h$ , and additionally, for any*  
660  *$f_{h+1} \in \mathcal{C}_{h+1}$ , we have  $\mathcal{T}f_{h+1} \in \mathcal{C}_h$  and  $f_h(s, a) \leq Q_h^{\pi^e}(s, a), \forall (s, a) \in \mathcal{S} \times \mathcal{A}$ .*

661 **Definition B.2** (Bilinear model Du et al. [9]). *We say that the MDP together with the function*  
662 *class  $\mathcal{F}$  is a bilinear model of rand  $d$  of for any  $h \in [H - 1]$ , there exist two (known) mappings*  
663  *$X_h, W_h : \mathcal{F} \mapsto \mathbb{R}^d$  with  $\max_f \|X_h(f)\|_2 \leq B_X$  and  $\max_f \|W_h(f)\|_2 \leq B_W$  such that*

$$\forall f, g \in \mathcal{F} : \left| \mathbb{E}_{s,a \sim d_h^\pi} [g_h(s, a) - \mathcal{T}g_{h+1}(s, a)] \right| = |\langle X_h(f), W_h(g) \rangle|. \quad (\text{B.8})$$

664 **Assumption B.3** (Bilinear Rank of Reference Policies). *Suppose  $Q^{\text{ref}} \in \mathcal{C}_{\text{ref}} \subset \mathcal{C}$ , where  $\mathcal{C}_{\text{ref}}$  is the*  
665 *function class of our reference policy, we assume the Bilinear rank of  $\mathcal{C}_{\text{ref}}$  is  $d_{\text{ref}}$  and  $d_{\text{ref}} \leq d$ .*

666 **Definition B.4** (Calibrated Bellman error transfer coefficient). *For any policy  $\pi$ , we define the*  
667 *calibrated transfer coefficient w.r.t. to a reference policy  $\pi^{\text{ref}}$  as*

$$C_\pi^{\text{ref}} := \max_{f \in \mathcal{C}, f(s,a) \geq Q^{\text{ref}}(s,a)} \frac{\sum_{h=0}^{H-1} \mathbb{E}_{s,a \sim d_h^\pi} [\mathcal{T}f_{h+1}(s, a) - f_h(s, a)]}{\sqrt{\sum_{h=0}^{H-1} \mathbb{E}_{s,a \sim \nu_h} (\mathcal{T}f_{h+1}(s, a) - f_h(s, a))^2}}, \quad (\text{B.9})$$

668 where  $Q^{\text{ref}} = Q^{\pi^{\text{ref}}}$ .

## 669 B.4 Discussions on the Assumptions

670 The pessimistic realizability and completeness assumption (Assumption B.1) is motivated by some  
671 theoretical studies of the pessimistic offline methods [59, 6] with regularizers:

$$\min_{\theta} \underbrace{\alpha (\mathbb{E}_{s \sim \mathcal{D}, a \sim \pi} [Q_\theta(s, a)] - \mathbb{E}_{s, a \sim \mathcal{D}} [Q_\theta(s, a)])}_{\text{Conservative regularizer } \mathcal{R}(\theta)} + \frac{1}{2} \mathbb{E}_{s, a, s' \sim \mathcal{D}} \left[ (Q_\theta(s, a) - \mathcal{B}^\pi \bar{Q}(s, a))^2 \right]. \quad (\text{B.10})$$

672 Since the goal of the conservative regularizer  $\mathcal{R}(\theta)$  intrinsically wants to enforce

$$Q_\theta(s, \pi(s)) \leq Q_\theta(s, \pi^e(s)), \quad (\text{B.11})$$

673 where  $\pi$  is the training policy and  $\pi^e$  is the reference (behavior) policy. One can consider (B.10) as  
674 the Lagrange duality formulation of the following primal optimization problem:

$$\min_{\theta} \mathbb{E}_{s,a,s' \sim \mathcal{D}} \left[ (Q_\theta(s, a) - \mathcal{B}^\pi \bar{Q}(s, a))^2 \right], \text{ subject to } \mathbb{E}_{s \sim \mathcal{D}, a \sim \pi} [Q_\theta(s, a)] \leq \mathbb{E}_{s \sim \mathcal{D}, a \sim \pi^e} [Q_\theta(s, a)], \quad (\text{B.12})$$

675 where the constraint set is equivalent to Assumption B.1. Although Assumption B.1 directly  
676 characterizes the constraint set of the primal form of (B.10) the exact theoretical connection between  
677 the pessimistic realizability and the regularized bellman consistency equation is beyond the scope of  
678 this work and we would like to leave that for future studies.

679 Assumption B.1 allows us to restrict the functional class of interest to a smaller conservative function  
680 class  $\mathcal{C} \subset \mathcal{F}$ , which leads to a smaller Bellman rank of the reference policy ( $d_{\text{ref}} \leq d$ ) suggested  
681 in Assumption B.3, and a smaller concentrability coefficient ( $C_{\pi^{\text{ref}}}^{\text{ref}} \leq C_\pi$ ) defined in Definition B.4,  
682 and C.2. Assumption B.3 and Definition C.2 provide the Bellman Bilinear rank and Bellman error  
683 transfer coefficient of the pessimistic functional class  $\mathcal{C}$  of interest.

## 684 B.5 Proof Structure Overview

685 We provide an overview of the proof structure and its dependency on different assumptions below:

- 686 • Theorem B.5: the total regret is decomposed into *offline regrets* and *online regrets*.
  - 687 – Bounding *offline regrets*, requiring Definition B.4 and the following lemmas:
    - 688 \* Performance difference lemma w.r.t. a comparator policy (Lemma C.5).
    - 689 \* Least square generalization bound (Lemma C.4), requiring Assumption B.1.
  - 690 – Bounding *online regrets*, requiring Definition B.2
    - 691 \* Performance difference lemma for the online error (Lemma C.6).
    - 692 \* Least square generalization bound (Lemma C.4), requiring Assumption B.1.
    - 693 \* Upper bounds with the bilinear model assumption (Lemma C.7).
    - 694 \* Applying Elliptical Potential Lemma [35] with bellman rank  $d$  and  $d_{\text{ref}}$
    - 695 (Lemma C.8), requiring Assumption B.3.

## 696 B.6 Our Results

697 **Theorem B.5** (Formal Result of Theorem 6.1). *Fix  $\delta \in (0, 1)$ ,  $m_{\text{off}} = K$ ,  $m_{\text{on}} = 1$ , suppose and the*  
698 *function class  $\mathcal{C}$  follows Assumption B.1 w.r.t.  $\pi^e$ . Suppose the underlying MDP admits Bilinear rank*  
699  *$d$  on function class  $\mathcal{C}$  and  $d_{\text{ref}}$  on  $\mathcal{C}_{\text{ref}}$ , respectively, then with probability at least  $1 - \delta$ , Algorithm 2*  
700 *obtains the following bound on cumulative suboptimality w.r.t. any comparator policy  $\pi^e$ :*

$$\sum_{t=1}^K V^{\pi^e} - V^{\pi^k} = \tilde{O} \left( \min \left\{ C_{\pi^e}^{\text{ref}} H \sqrt{dK \log(|\mathcal{F}|/\delta)}, K \left( V^{\pi^e} - V^{\text{ref}} \right) + H \sqrt{d_{\text{ref}} K \log(|\mathcal{F}|/\delta)} \right\} \right). \quad (\text{B.13})$$

701 Note that Theorem B.5 provides a guarantee for *any* comparator policy  $\pi^e$ , which can be directly  
702 applied to  $\pi^*$  described in our informal result (Theorem 6.1). We also change the notation for the  
703 reference policy from  $\mu$  in Theorem 6.1 to  $\pi^{\text{ref}}$  (similarly,  $d_{\text{ref}}$ ,  $V^{\text{ref}}$ ,  $C_{\pi^e}^{\text{ref}}$  correspond to  $d_\mu$ ,  $V^\mu$ ,  $C_{\pi^e}^\mu$   
704 in Theorem 6.1) for notation consistency in the proof. Our proof of Theorem B.5 largely follows the  
705 proof of Theorem 1 of [52], and the major changes are caused by Assumption B.1, Assumption B.3,  
706 and Definition B.4.

707 *Proof.* Let  $\mathcal{E}_k$  denote the event that  $\{f_0^k(s, a) \leq Q^{\text{ref}}(s, a)\}$  and  $\bar{\mathcal{E}}_k$  denote the event that  
 708  $\{f_0^k(s, a) > Q^{\text{ref}}(s, a)\}$ . Let  $V^{\text{ref}}(s) = \max_a Q^{\text{ref}}(s, a)$ , we start by noting that

$$\begin{aligned}
 \sum_{k=1}^K V^{\pi^e} - V^{\pi^{f^k}} &= \sum_{k=1}^K \mathbb{E}_{s \sim \rho} \left[ V_0^{\pi^e}(s) - V_0^{\pi^{f^k}}(s) \right] \\
 &= \underbrace{\sum_{k=1}^K \mathbb{E}_{s \sim \rho} \left[ \mathbb{1}\{\bar{\mathcal{E}}_k\} \left( V_0^{\pi^e}(s) - V^{\text{ref}}(s) \right) \right]}_{\Gamma_0} + \underbrace{\sum_{k=1}^K \mathbb{E}_{s \sim \rho} \left[ \mathbb{1}\{\bar{\mathcal{E}}_k\} \left( V^{\text{ref}}(s) - \max_a f_0^k(s, a) \right) \right]}_{=0, \text{ by the definition of } \mathcal{E}_k \text{ and line 9 of Algorithm 2}} \\
 &\quad + \underbrace{\sum_{t=1}^K \mathbb{E}_{s \sim \rho} \left[ \mathbb{1}\{\bar{\mathcal{E}}_k\} \left( \max_a f_0^k(s, a) - V_0^{\pi^{f^k}}(s) \right) \right]}_{\Gamma_1} + \underbrace{\sum_{k=1}^K \mathbb{E}_{s \sim \rho} \left[ \mathbb{1}\{\mathcal{E}_k\} \left( V_0^{\pi^e}(s) - \max_a f_0^k(s, a) \right) \right]}_{\Gamma_2} \\
 &\quad + \underbrace{\sum_{t=1}^T \mathbb{E}_{s \sim \rho} \left[ \mathbb{1}\{\mathcal{E}_k\} \left( \max_a f_0^k(s, a) - V_0^{\pi^{f^k}}(s) \right) \right]}_{\Gamma_3}.
 \end{aligned} \tag{B.14}$$

709 Let  $K_1 = \sum_{k=1}^K \mathbb{1}\{f_0^k(s, a) > Q^{\text{ref}}(s, a)\}$  and  $K_2 = \sum_{k=1}^K \mathbb{1}\{f_0^k(s, a) \leq Q^{\text{ref}}(s, a)\}$  (or equiva-  
 710 lently  $K_1 = \sum_{k=1}^K \mathbb{1}\{\bar{\mathcal{E}}_k\}$ ,  $K_2 = \sum_{k=1}^K \mathbb{1}\{\mathcal{E}_k\}$ ). For  $\Gamma_0$ , we have

$$\Gamma_0 = K_2 \mathbb{E}_{s \sim \rho} \left( V^{\pi^e}(s) - V^{\text{ref}}(s) \right). \tag{B.15}$$

711 For  $\Gamma_2$ , we have

$$\begin{aligned}
 \Gamma_2 &= \sum_{k=1}^K \mathbb{E}_{s \sim \rho} \left[ \mathbb{1}\{\mathcal{E}_k\} \left( V_0^{\pi^e}(s) - \max_a f_0^k(s, a) \right) \right] \\
 &\stackrel{(i)}{\leq} \sum_{k=1}^K \mathbb{1}\{\mathcal{E}_k\} \sum_{h=0}^{H-1} \mathbb{E}_{s, a \sim d_h^{\pi^e}} \left[ \mathcal{T} f_{h+1}^k(s, a) - f_h^k(s, a) \right] \\
 &\stackrel{(ii)}{\leq} \sum_{k=1}^K \left[ C_{\pi^e}^{\text{ref}} \cdot \mathbb{1}\{\mathcal{E}_k\} \sqrt{\sum_{h=0}^{H-1} \mathbb{E}_{s, a \sim \nu_h} \left[ (f_h^k(s, a) - \mathcal{T} f_{h+1}^k(s, a))^2 \right]} \right] \\
 &\stackrel{(iii)}{\leq} K_1 C_{\pi^e}^{\text{ref}} \sqrt{H \cdot \Delta_{\text{off}}},
 \end{aligned} \tag{B.16}$$

712 where  $\Delta_{\text{off}}$  is similarly defined as Song et al. [52] (See (C.3) of Lemma C.4). Inequality (i) holds  
 713 because of Lemma C.5, inequality (ii) holds by the definition of  $C_{\pi^e}^{\text{ref}}$  (Definition B.4), inequality (iii)  
 714 holds by applying Lemma C.4 with the function class satisfying Assumption B.1, and Definition B.4.  
 715 Note that the telescoping decomposition technique in the above equation also appears in [58, 24, 9].  
 716 Next, we will bound  $\Gamma_1 + \Gamma_3$ :

$$\begin{aligned}
 \Gamma_1 + \Gamma_3 &= \sum_{k=1}^K (\mathbb{1}\{\mathcal{E}_k\} + \mathbb{1}\{\bar{\mathcal{E}}_k\}) \mathbb{E}_{s \sim d_0} \left[ \max_a f_0^k(s, a) - V_0^{\pi^{f^k}}(s) \right] \\
 &\stackrel{(i)}{\leq} \sum_{k=1}^K (\mathbb{1}\{\mathcal{E}_k\} + \mathbb{1}\{\bar{\mathcal{E}}_k\}) \sum_{h=0}^{H-1} \left| \mathbb{E}_{s, a \sim d_h^{\pi^{f^k}}} \left[ f_h^k(s, a) - \mathcal{T} f_{h+1}^k(s, a) \right] \right| \\
 &\stackrel{(ii)}{=} \sum_{t=1}^K \left[ (\mathbb{1}\{\mathcal{E}_k\} + \mathbb{1}\{\bar{\mathcal{E}}_k\}) \sum_{h=0}^{H-1} \left| \langle X_h(f^k), W_h(f^k) \rangle \right| \right] \\
 &\stackrel{(iii)}{\leq} \sum_{k=1}^K \left[ (\mathbb{1}\{\mathcal{E}_k\} + \mathbb{1}\{\bar{\mathcal{E}}_k\}) \sum_{h=0}^{H-1} \|X_h(f^k)\|_{\Sigma_{k-1, h}^{-1}} \sqrt{\Delta_{\text{on}} + \lambda B_W^2} \right],
 \end{aligned} \tag{B.17}$$

where  $\Delta_{\text{on}}$  is similarly defined as Song et al. [52] (See (C.4) of Lemma C.4). Inequality (i) holds by Lemma C.6, equation (ii) holds by the definition of Bilinear model ((B.8) in Definition B.2), inequality (iii) holds by Lemma C.7 and Lemma C.4 with the function class satisfying Assumption B.1. Using Lemma C.8, we have that

$$\begin{aligned}
& \Gamma_1 + \Gamma_3 \\
& \leq \sum_{k=1}^K \left[ \left( \mathbb{1}\{\mathcal{E}_k\} + \mathbb{1}\{\bar{\mathcal{E}}_k\} \right) \sum_{h=0}^{H-1} \left\| X_h(f^k) \right\|_{\Sigma_{k-1;h}^{-1}} \sqrt{\Delta_{\text{on}} + \lambda B_W^2} \right] \\
& \stackrel{(i)}{\leq} H \sqrt{2d \log \left( 1 + \frac{K_1 B_X^2}{\lambda d} \right) \cdot (\Delta_{\text{on}} + \lambda B_W^2) \cdot K_1} + H \sqrt{2d_{\text{ref}} \log \left( 1 + \frac{K_2 B_X^2}{\lambda d_{\text{ref}}} \right) \cdot (\Delta_{\text{on}} + \lambda B_W^2) \cdot K_2} \\
& \stackrel{(ii)}{\leq} H \left( \sqrt{2d \log \left( 1 + \frac{K_1}{d} \right) \cdot (\Delta_{\text{on}} + B_X^2 B_W^2) \cdot K_1} + \sqrt{2d_{\text{ref}} \log \left( 1 + \frac{K_2}{d_{\text{ref}}} \right) \cdot (\Delta_{\text{on}} + B_X^2 B_W^2) \cdot K_2} \right), \tag{B.18}
\end{aligned}$$

where the first part of inequality (i) holds by the assumption that the underlying MDPs have bellman rank  $d$  (Definition B.2) when  $\mathcal{E}_k$  happens, and the second part of inequality (i) holds by the assumption that  $C_{\text{ref}}$  has bilinear rank  $d_{\text{ref}}$  (Assumption B.3)  $C_{\text{ref}}$  has bellman rank  $d_{\text{ref}}$  when  $\bar{\mathcal{E}}_k$  happens. Inequality (ii) holds by plugging in  $\lambda = B_X^2$ . Substituting (B.15), inequality B.16, and inequality (B.18) into (B.14), we have

$$\begin{aligned}
& \sum_{t=1}^K V^{\pi^e} - V^{\pi^{f^k}} \leq \Gamma_0 + \Gamma_2 + \Gamma_1 + \Gamma_3 \leq K_2 \left( V^{\pi^e}(s) - V^{\text{ref}}(s) \right) + K_1 C_{\pi^e}^{\text{ref}} \sqrt{H \cdot \Delta_{\text{off}}} \\
& + H \left( \sqrt{2d \log \left( 1 + \frac{K_1}{d} \right) \cdot (\Delta_{\text{on}} + B_X^2 B_W^2) \cdot K_1} + \sqrt{2d_{\text{ref}} \log \left( 1 + \frac{K_2}{d_{\text{ref}}} \right) \cdot (\Delta_{\text{on}} + B_X^2 B_W^2) \cdot K_2} \right) \tag{B.19}
\end{aligned}$$

Plugging in the values of  $\Delta_{\text{on}}, \Delta_{\text{off}}$  from (C.3) and (C.4), and using the subadditivity of the square root function, we have

$$\begin{aligned}
& \sum_{k=1}^K V^{\pi^e} - V^{\pi^{f^k}} \\
& \leq K_2 \left( V^{\pi^e}(s) - V^{\text{ref}}(s) \right) + 16V_{\max} C_{\pi^e}^{\text{ref}} K_1 \sqrt{\frac{H}{m_{\text{off}}} \log \left( \frac{2HK_1|\mathcal{F}|}{\delta} \right)} \\
& + \left( 16V_{\max} \sqrt{\frac{1}{m_{\text{on}}} \log \left( \frac{2HK_1|\mathcal{F}|}{\delta} \right)} + B_X B_W \right) \cdot H \sqrt{2dK_1 \log \left( 1 + \frac{K_1}{d} \right)} \\
& + \left( 16V_{\max} \sqrt{\frac{1}{m_{\text{on}}} \log \left( \frac{2HK_2|\mathcal{F}|}{\delta} \right)} + B_X B_W \right) \cdot H \sqrt{2d_{\text{ref}} K_2 \log \left( 1 + \frac{K_2}{d_{\text{ref}}} \right)}. \tag{B.20}
\end{aligned}$$

Setting  $m_{\text{off}} = K, m_{\text{on}} = 1$  in the above equation completes the proof, we have

$$\begin{aligned}
& \sum_{k=1}^K V^{\pi^e} - V^{\pi^k} \\
& \leq \tilde{O} \left( C_{\pi^e}^{\text{ref}} \sqrt{HK_1 \log(|\mathcal{F}|/\delta)} \right) + \tilde{O} \left( H \sqrt{dK_1 \log(|\mathcal{F}|/\delta)} \right) \\
& + K_2 \left( V^{\pi^e}(s) - V^{\text{ref}}(s) \right) + \tilde{O} \left( H \sqrt{d_{\text{ref}} K_2 \log(|\mathcal{F}|/\delta)} \right) \tag{B.21} \\
& \leq \begin{cases} \tilde{O} \left( C_{\pi^e}^{\text{ref}} H \sqrt{dK_1 \log(|\mathcal{F}|/\delta)} \right) & \text{if } K_1 \gg K_2, \\ \tilde{O} \left( K_2 (V^{\pi^e} - V^{\text{ref}}) + H \sqrt{d_{\text{ref}} K_2 \log(|\mathcal{F}|/\delta)} \right) & \text{otherwise.} \end{cases} \\
& \leq \tilde{O} \left( \min \left\{ C_{\pi^e}^{\text{ref}} H \sqrt{dK \log(|\mathcal{F}|/\delta)}, K (V^{\pi^e} - V^{\text{ref}}) + H \sqrt{d_{\text{ref}} K \log(|\mathcal{F}|/\delta)} \right\} \right),
\end{aligned}$$

where the last inequality holds because  $K_1, K_2 \leq K$ , which completes the proof.  $\square$

## C Key Results of HyQ [52]

In this section, we restate the major theoretical results of Hy-Q [52] for completeness.

### C.1 Assumptions

**Assumption C.1** (Realizability and Bellman completeness). *For any  $h$ , we have  $Q_h^* \in \mathcal{F}_h$ , and additionally, for any  $f_{h+1} \in \mathcal{F}_{h+1}$ , we have  $\mathcal{T}f_{h+1} \in \mathcal{F}_h$ .*

**Definition C.2** (Bellman error transfer coefficient). *For any policy  $\pi$ , we define the transfer coefficient as*

$$C_\pi := \max \left\{ 0, \max_{f \in \mathcal{F}} \frac{\sum_{h=0}^{H-1} \mathbb{E}_{s,a \sim d_h^\pi} [\mathcal{T}f_{h+1}(s,a) - f_h(s,a)]}{\sqrt{\sum_{h=0}^{H-1} \mathbb{E}_{s,a \sim \nu_h} (\mathcal{T}f_{h+1}(s,a) - f_h(s,a))^2}} \right\}. \quad (\text{C.1})$$

### C.2 Main Theorem of Hy-Q

**Theorem C.3** (Theorem 1 of Song et al. [52]). *Fix  $\delta \in (0, 1)$ ,  $m_{\text{off}} = K$ ,  $m_{\text{on}} = 1$ , and suppose that the underlying MDP admits Bilinear rank  $d$  (Definition B.2), and the function class  $\mathcal{F}$  satisfies Assumption C.1. Then with probability at least  $1 - \delta$ , HyQ obtains the following bound on cumulative suboptimality w.r.t. any comparator policy  $\pi^e$ :*

$$\text{Reg}(K) = \tilde{O} \left( \max\{C_{\pi^e}, 1\} V_{\max} B_X B_W \sqrt{dH^2 K \cdot \log(|\mathcal{F}|/\delta)} \right). \quad (\text{C.2})$$

### C.3 Key Lemmas

#### C.3.1 Least Squares Generalization and Applications

**Lemma C.4** (Lemma 7 of Song et al. [52], Online and Offline Bellman Error Bound for FQI). *Let  $\delta \in (0, 1)$  and  $\forall h \in [H-1], k \in [K]$ , let  $f_h^{k+1}$  be the estimated value function for time step  $h$  computed via least square regression using samples in the dataset  $\{\mathcal{D}_h^0, \mathcal{D}_h^1, \dots, \mathcal{D}_h^T\}$  in (B.1) in the iteration  $t$  of Algorithm 2. Then with probability at least  $1 - \delta$ , for any  $h \in [H-1]$  and  $k \in [K]$ , we have*

$$\|f_h^{k+1} - \mathcal{T}f_{h+1}^{k+1}\|_{2, \nu_h}^2 \leq \frac{1}{m_{\text{off}}} 256 V_{\max}^2 \log(2HK|\mathcal{F}|/\delta) =: \Delta_{\text{off}} \quad (\text{C.3})$$

and

$$\sum_{\tau=1}^k \|f_h^{k+1} - \mathcal{T}f_{h+1}^{k+1}\|_{2, \mu_h^\tau}^2 \leq \frac{1}{m_{\text{on}}} 256 V_{\max}^2 \log(2HK|\mathcal{F}|/\delta) =: \Delta_{\text{on}}, \quad (\text{C.4})$$

where  $\nu_h$  denotes the offline data distribution at time  $h$ , and the distribution  $\mu_h^\tau \in \Delta(s, a)$  is defined such that  $s, a \sim d_h^{\pi^\tau}$ .

#### C.3.2 Bounding Offline Suboptimality via Performance Difference Lemma

**Lemma C.5** (Lemma 5 of Song et al. [52], performance difference lemma of w.r.t.  $\pi^e$ ). *Let  $\pi^e = (\pi_0^e, \dots, \pi_{H-1}^e)$  be a comparator policy and consider any value function  $f = (f_0, \dots, f_{H-1})$ , where  $f_h : \mathcal{S} \times \mathcal{A} \mapsto \mathbb{R}$ . Then we have*

$$\mathbb{E}_{s \sim d_0} \left[ V_0^{\pi^e}(s) - \max_a f_0(s, a) \right] \leq \sum_{i=1}^{H-1} \mathbb{E}_{s, a \sim d_i^{\pi^e}} [\mathcal{T}f_{i+1}(s, a) - f_i(s, a)], \quad (\text{C.5})$$

where we define  $f_H(s, a) = 0, \forall (s, a)$ .

#### C.3.3 Bounding Online Suboptimality via Performance Difference Lemma

**Lemma C.6** (Lemma 4 of Song et al. [52], performance difference lemma). *For any function  $f = (f_0, \dots, f_{H-1})$  where  $f_h : \mathcal{S} \times \mathcal{A} \mapsto \mathbb{R}$  and  $h \in [H-1]$ , we have*

$$\mathbb{E}_{s \sim d_0} \left[ \max_a f_0(s, a) - V_0^{\pi^f}(s) \right] \leq \sum_{h=0}^{H-1} \left| \mathbb{E}_{s, a \sim d_h^{\pi^f}} [f_h(s, a) - \mathcal{T}f_{h+1}(s, a)] \right|, \quad (\text{C.6})$$

where we define  $f_H(s, a) = 0, \forall s, a$ .



761 **Lemma C.7** (Lemma 8 of Song et al. [52], upper bounding bilinear class). *For any  $k \geq 2$  and*  
 762  *$h \in [H - 1]$ , we have*

$$|\langle W_h(f^k), X_h(f^k) \rangle| \leq \|X_h(f^k)\|_{\Sigma_{k-1;h}^{-1}} \sqrt{\sum_{i=1}^{k-1} \mathbb{E}_{s,a \sim d_h^{f^i}} [(f_h^k - \mathcal{T} f_{h+1}^k)^2]} + \lambda B_W^2, \quad (\text{C.7})$$

763 *where  $\Sigma_{k-1;h}$  is defined as (B.5) and we use  $d_h^{f^k}$  to denote  $d_h^{\pi_{f^k}}$ .*

764 **Lemma C.8** (Lemma 6 of Song et al. [52], bounding the inverse covariance norm). *Let*  
 765  *$X_h(f^1), \dots, X_h(f^K) \in \mathbb{R}^d$  be a sequence of vectors with  $\|X_h(f^k)\|_2 \leq B_X < \infty, \forall k \leq K$ .*  
 766 *Then we have*

$$\sum_{k=1}^K \|X_h(f^k)\|_{\Sigma_{k-1;h}^{-1}} \leq \sqrt{2dK \log \left( 1 + \frac{KB_X^2}{\lambda d} \right)}, \quad (\text{C.8})$$

767 *where we define  $\Sigma_{k;h} := \sum_{\tau=1}^k X_h(f^\tau) X_h(f^\tau)^T + \lambda \mathbf{I}$  and we assume  $\lambda \geq B_X^2$  holds  $\forall k \in [K]$ .*

## 768 D Environment Details

### 769 D.1 Antmaze

770 The Antmaze navigation tasks aim to control an 8-DoF ant quadruped robot to move from a starting  
 771 point to a desired goal in a maze. The agent will receive sparse +1/0 rewards depending on whether  
 772 it reaches the goal or not. We study each method on “medium” and “hard” (shown in Figure 5)  
 773 mazes which are difficult to solve, using the following datasets from D4RL [10]: large-diverse,  
 774 large-play, medium-diverse, and medium-play. The difference between “diverse” and “play”  
 775 datasets is the optimality of the trajectories they contain. The “diverse” datasets contain the trajectories  
 776 commanded to a random goal from random starting points, while the “play” datasets contain the  
 777 trajectories commanded to specific locations which are not necessarily the goal. We used an episode  
 778 length of 1000 for each task. For Cal-QL, CQL, and IQL, we pre-trained the agent using the offline  
 779 dataset for 1M steps. We then trained online fine-tuning for 1M environment steps for each method.

### 780 D.2 Franka Kitchen

781 The Franka Kitchen domain require controlling a 9-DoF Franka robot to arrange a kitchen environment  
 782 into a desired configuration. The configuration is decomposed into 4 subtasks, and the agent will  
 783 receive rewards of 0, +1, +2, +3, or +4 depending on how many subtasks it has managed to solve. To  
 784 solve the whole task and reach the desired configuration, it is important to learn not only how to solve  
 785 each subtask, but also to figure out the correct order to solve. We study this domain using datasets  
 786 with three different optimalities: kitchen-complete, kitchen-partial, and kitchen-mixed.  
 787 The “complete” dataset contains the trajectories of the robot performing the whole task completely.  
 788 The “partial” dataset partially contains some complete demonstrations, while others are incomplete  
 789 demonstrations solving the subtasks. The “mixed” dataset only contains incomplete data without any  
 790 complete demonstrations, which is hard and requires the highest degree of stitching and generalization  
 791 ability. We used an episode length of 1000 for each task. For Cal-QL, CQL, and IQL, we pre-trained  
 792 the agent using the offline dataset for 500K steps. We then performed online fine-tuning for 1.25M  
 793 environment steps for each method.

### 794 D.3 Adroit

795 The Adroit domain involves controlling a 24-DoF shadow hand robot. There are 3 tasks we consider  
 796 in this domain: pen-binary, relocate-binary, relocate-binary. These tasks comprise a  
 797 limited set of narrow human expert data distributions ( $\sim 25$ ) with additional trajectories collected by  
 798 a behavior-cloned policy. We truncated each trajectory and used the positive segments (terminate  
 799 when the positive reward signal is found) for all methods. This domain has a very narrow dataset  
 800 distribution and a large action space. In addition, learning in this domain is difficult due to the sparse  
 801 reward, which leads to exploration challenges. We utilized a variant of the dataset used in prior work  
 802 [44] to have a standard comparison with SOTA offline fine-tuning experiments that consider this  
 803 domain. For the offline learning phase, we pre-trained the agent for 20K steps. We then performed  
 804 online fine-tuning for 300K environment steps for the pen-binary task, and 1M environment steps  
 805 for the door-binary and relocate-binary tasks. The episode length is 100, 200, and 200 for  
 806 pen-binary, door-binary, and relocate-binary respectively.



## 807 D.4 Visual Manipulation Domain

808 The Visual Manipulation domain consists of a pick-and-place task. This task is a multitask formulation  
809 explored in the work, Pre-training for Robots (PTR) [33]. Here each task is defined as placing an  
810 object in a bin. A distractor object was present in the scene as an adversarial object which the agent  
811 had to avoid picking. There were 10 unique objects and no overlap between the task objects and  
812 the interfering/distractor objects. The episode length is 40. For the offline phase, we pre-trained the  
813 policy with offline data for 50K steps. We then performed online fine-tuning for 100K environment  
814 steps for each method, taking 5 gradient steps per environment step.

## 815 E Experiment Details

### 816 E.1 Normalized Scores

817 The visual-manipulation, adroit, and antmaze domains are all goal-oriented, sparse reward  
818 tasks. In these domains, we computed the normalized metric as simply the goal achieved rate for each  
819 method. For example, in the visual manipulation environment, if the object was placed successfully in  
820 the bin, a +1 reward was given to the agent and the task is completed. Similarly, for the door-binary  
821 task in the adroit tasks, we considered the success rate of opening the door. For the kitchen task, the  
822 task is to solve a series of 4 sub-tasks that need to be solved in an iterative manner. The normalized  
823 score is computed simply as  $\frac{\text{\#tasks solved}}{\text{total tasks}}$ .

### 824 E.2 Mixing Ratio Hyperparameter

825 In this work, we explore the mixing ratio parameter  $m$ , which is used during the online fine-tuning  
826 phase. The mixing ratio is either a value in the range  $[0, 1]$  or the value -1. If this mixing ratio is  
827 within  $[0, 1]$ , it represents what percentage of offline and online data is seen in each batch when  
828 fine-tuning. For example, if the mixing ratio  $m = 0.25$ , that means for each batch we sample 25%  
829 from the offline data and 75% from online data. Instead, if the mixing ratio is -1, the buffers are  
830 appended to each other and sampled uniformly.

### 831 E.3 Details and Hyperparameters for CQL and Cal-QL

832 We list the hyperparameters for CQL and Cal-QL in Table 3. We utilized a variant of Bellman backup  
833 that computes the target value by performing a maximization over target values computed for  $k$   
834 actions sampled from the policy at the next state, where we used  $k = 4$  in visual pick and place  
835 domain and  $k = 10$  in others. In the Antmaze domain, we used the dual version of CQL [32] and  
836 conducted ablations over the value of the threshold of the CQL regularizer  $\mathcal{R}(\theta)$  (target action gap)  
837 instead of  $\alpha$ . In the visual-manipulation domain which is not presented in the original paper, we  
838 swept over the alpha values of  $\alpha = 0.5, 1, 5, 10$ , and utilized separate  $\alpha$  values for offline ( $\alpha = 5$ )  
839 and online ( $\alpha = 0.5$ ) phases for the final results. We built our code upon the CQL implementation  
840 from <https://github.com/young-geng/JaxCQL> [14]. We used a single NVIDIA TITAN RTX  
841 chip to run each of our experiments.

### 842 E.4 Details and Hyperparameters for IQL

843 We list the hyperparameters for IQL in Table 4. To conduct our experiments, we used the of-  
844 ficial implementation of IQL provided by the authors [30], and primarily followed their recom-  
845 mended parameters, which they previously ablated over in their work. In the visual-manipulation  
846 domain which is not presented in the original paper, we performed a parameter sweep over expect-  
847 tile  $\tau = 0.5, 0.6, 0.7, 0.8, 0.9, 0.95, 0.99$  and temperature  $\beta = 1, 3, 5, 10, 25, 50$  and selected the  
848 best-performing values of  $\tau = 0.7$  and  $\beta = 10$  for our final results. In addition, as the second  
849 best-performing method in the visual-manipulation domain, we also attempted to use separate  $\beta$   
850 values for IQL, for a fair comparison with CQL and Cal-QL. However, we found that it has little to  
851 no effect, as shown in Figure 9.

### 852 E.5 Details and Hyperparameters for AWAC and ODT

853 We used the JAX implementation of AWAC from <https://github.com/ikostrikov/jaxrl> [29].  
854 We primarily followed the author’s recommended parameters, where we used the Lagrange multiplier  
855  $\lambda = 1.0$  for the Antmaze and Franka Kitchen domains, and  $\lambda = 0.3$  for the Adroit domain. In

the visual-manipulation domain, we performed a parameter sweep over  $\lambda = 0.1, 0.3, 1, 3, 10$  and selected the best-performing value of  $\lambda = 1$  for our final results. For ODT, we used the author’s official implementation from <https://github.com/facebookresearch/online-dt>, with the author’s recommended parameters they used in the Antmaze domain. In addition, in support of our result of AWAC and ODT (as shown in Table 1), the poor performance of Decision Transformers and AWAC in the Antmaze domain can also be observed in Table 1 and Table 2 of the IQL paper [30].

## E.6 Details and Hyperparameters for SAC, SAC + Offline Data, Hybrid RL and CQL + SAC

We used the standard hyperparameters for SAC as derived from the original implementation in [19]. We used the same other hyperparameters as CQL and Cal-QL. We used automatic entropy tuning for the policy and critic entropy terms, with a target entropy of the negative action dimension. For SAC, the agent is only trained with the online explored data. For SAC + Offline Data, the offline data and online explored data is combined together and sampled uniformly. For Hybrid RL, we use the same mixing ratio used for CQL and Cal-QL presented in Table 3. For CQL + SAC, we first pre-train with CQL and then run online fine-tuning using both offline and online data, also using the same mixing ratio presented in Table 3.

Table 3: CQL, Cal-QL Hyperparameters

| Hyperparameters   | Adroit               | Kitchen               | Antmaze | Manipulation               |
|-------------------|----------------------|-----------------------|---------|----------------------------|
| $\alpha$          | 1                    | 5                     | -       | 5 (online: 0.5)            |
| target action gap | -                    | -                     | 0.8     | -                          |
| mixing ratio      | -1, 0.25, <b>0.5</b> | -1, <b>0.25</b> , 0.5 | 0.5     | 0.2, <b>0.5</b> , 0.7, 0.9 |

Table 4: IQL Hyperparameters

| Hyperparameters     | Adroit               | Kitchen               | Antmaze | Manipulation               |
|---------------------|----------------------|-----------------------|---------|----------------------------|
| expectile $\tau$    | 0.8                  | 0.7                   | 0.9     | 0.7                        |
| temperature $\beta$ | 3                    | 0.5                   | 10      | 10                         |
| mixing ratio        | -1, <b>0.2</b> , 0.5 | -1, <b>0.25</b> , 0.5 | 0.5     | 0.2, <b>0.5</b> , 0.7, 0.9 |

## F Extended Discussion on Limitations of Existing Fine-Tuning Methods

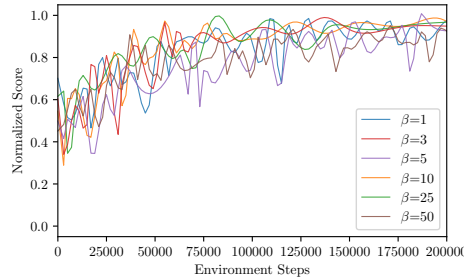

Figure 9: **Abalation on IQL’s online temperature values:** The change in the temperature  $\beta$  used in online fine-tuning phase has little to no effect on the sample efficiency.

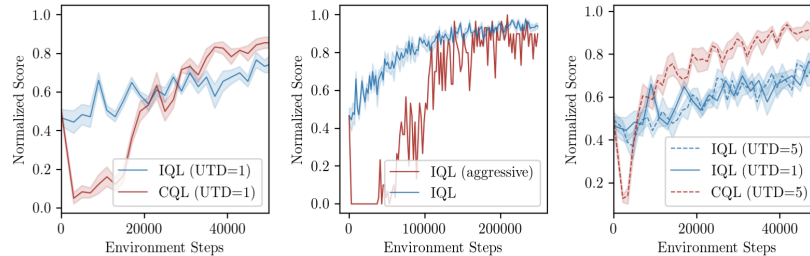

Figure 10: **IQL and CQL:** Step 0 on the x-axis is the performance after offline pre-training. Observe while CQL suffers from initial policy unlearning, IQL improves slower throughout fine-tuning.

In this section, we aim to highlight some potential reasons behind the slow improvement of other methods in our empirical analysis experiment in Section 4.1, and specifically, we use IQL for the analysis. We first swept over the temperature  $\beta$  values used in the online fine-tuning phase for IQL, which controls the constraint on how closely the learned policy should match the behavior policy. As shown in Figure 9, the change in the temperature  $\beta$  has little to no effect on the sample efficiency. Another natural hypothesis is that IQL improves slowly because we are not making enough updates per unit of data collected by the environment. To investigate this, we ran IQL with (a) five times as many gradient steps per step of data collection (UTD = 5), and (b) with a more aggressive policy update. Observe in Figure 10 that (a) does not improve the asymptotic performance of IQL, although it does improve CQL meaning that there is room for improvement on this task by making more gradient updates. Observe in Figure 10 that (b) often induces policy unlearning, similar to the failure mode in CQL. These two observations together indicate that a policy constraint approach can slow down learning asymptotically, and we cannot increase the speed by making more aggressive updates as this causes the policy to find erroneously optimistic out-of-distribution actions, and unlearn the policy learned from offline data.

## G Impact of Estimation Errors in the Reference Value Function

In our experiments, we compute the reference value functions using Monte-Carlo return estimates. However, this may not be available in all tasks. How does Cal-QL behave when reference value functions must be estimated using the offline dataset itself? To answer this, we ran an experiment on the kitchen domain, where instead of using an estimate for  $Q^\mu$  based on the Monte-Carlo return, we train a neural network function approximator  $Q_\theta^\mu$  to approximate  $Q^\mu$  via supervised regression on to Monte-Carlo return, which is then utilized by Cal-QL. Observe in Figure 11, that the performance of Cal-QL largely remains unaltered. This implies as long as we can obtain a reasonable function approximator to estimate the Q-function of the reference policy (in this case, the behavior policy), errors in the reference Q-function do not affect the performance of Cal-QL significantly.

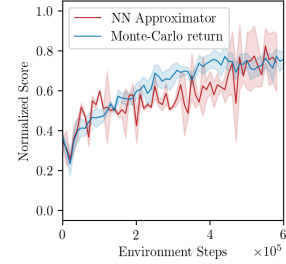

Figure 11: The performance of Cal-QL using a neural net approximator for the reference value function is comparable to using the Monte-Carlo return.

## H Initial Unlearning of CQL on Multiple Tasks

In this section, we show the learning curves of CQL and Cal-QL from Figure 6 and zoom in on the x-axis to provide a clearer visualization of CQL’s initial unlearning in the Franka Kitchen, Adroit, and the visual-manipulation domains. As depicted in Figure 12, it is evident across all tasks that while CQL experiences initial unlearning, Cal-QL can effectively mitigate it and quickly recovers its performance. Regarding the Antmaze domain, as we discussed in section 7.3, CQL does not exhibit initial unlearning since the default dataset has a high coverage of data. However, we can observe a similar phenomenon if we narrow down the dataset distribution (as shown in Figure 8).

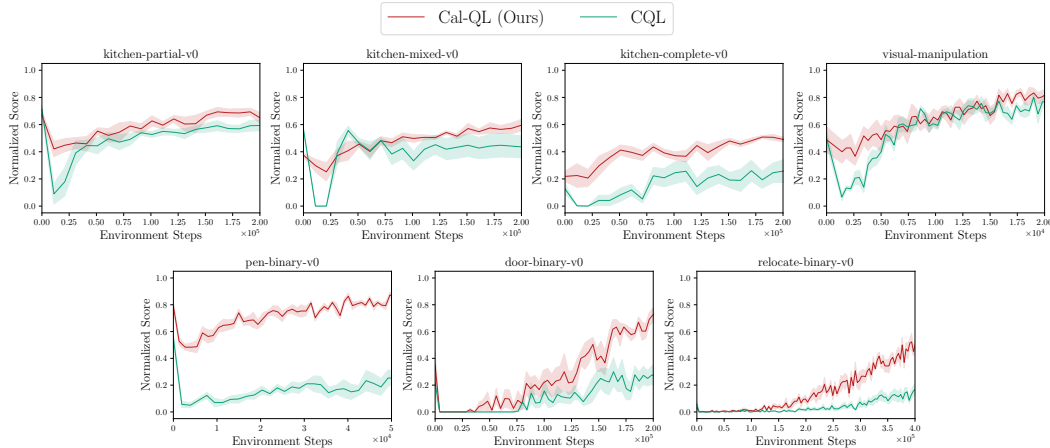

Figure 12: While CQL experiences initial unlearning, Cal-QL effectively mitigates it and quickly recovers its performance.
