# Supplementary material
Source: ML conference proceedings conference paper supplement (https://openreview.net/forum?id=GcEIvidYSw)
Supplement: supplementary_material [file attachment]

# Cal-QL: Calibrated Offline RL Pre-Training for Efficient Online Fine-Tuning

Anonymous Author(s)

Affiliation

Address

email

## Abstract

A compelling use case of offline reinforcement learning (RL) is to obtain a policy initialization from existing datasets followed by fast online fine-tuning with limited interaction. However, existing offline RL methods tend to behave poorly during fine-tuning. In this paper, we study the fine-tuning problem in the context of conservative offline RL methods and we devise an approach for learning an effective initialization from offline data that also enables fast online fine-tuning capabilities. Our approach, calibrated Q-learning (Cal-QL), accomplishes this by learning a conservative value function initialization that underestimates the value of the learned policy from offline data, while also ensuring that the learned Q-values are at a reasonable scale. We refer to this property as calibration, and define it formally as providing a lower bound on the true value function of the learned policy and an upper bound on the value of some other (suboptimal) reference policy, which may simply be the behavior policy. We show that a conservative offline RL algorithm that also learns a calibrated value function leads to effective online fine-tuning, enabling us to take the benefits of offline initializations in online fine-tuning. In practice, Cal-QL can be implemented on top of the conservative Q learning (CQL) [32] for offline RL within a one-line code change. Empirically, Cal-QL outperforms state-of-the-art methods on **9/11** fine-tuning benchmark tasks that we study in this paper.

## 1 Introduction

Modern machine learning successes follow a common recipe: pre-training models on general-purpose, Internet-scale data, followed by fine-tuning the pre-trained initialization on a limited amount of data for the task of interest [22, 7]. How can we translate such a recipe to sequential decision-making problems? A natural way to instantiate this paradigm is to utilize offline reinforcement learning (RL) methods [37] for initializing value functions and policies from static datasets, followed by online fine-tuning to improve this initialization with limited active interaction. If successful, such a recipe might enable effective online RL with much fewer samples than current methods that learn from scratch.

Many algorithms for offline RL have been applied to online fine-tuning. Empirical results across such works suggest a counter-intuitive trend: policy initializations obtained from more effective offline RL methods tend to exhibit worse online fine-tuning performance, even within the

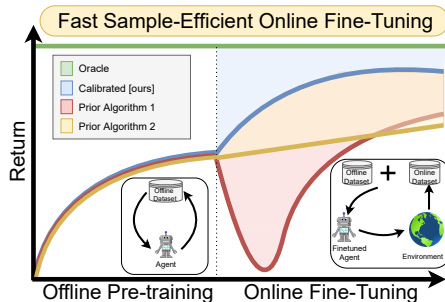

Figure 1: We study **offline RL pre-training followed by online RL fine-tuning**. Some prior offline RL methods tend to exhibit slow performance improvement in this setting (yellow), resulting in worse asymptotic performance. Others suffer from initial performance degradation once online fine-tuning begins (red), resulting in a high cumulative regret. We develop an approach that “calibrates” the learned value function to attain a fast improvement with a smaller regret (blue).

40 same task (see Table 2 of [31] & Figure 4 of [57]). On the other end, online RL methods training  
 41 from scratch (or RL from demonstrations [53], where the replay buffer is seeded with the offline  
 42 data) seem to improve online at a significantly faster rate. But these online methods require actively  
 43 collecting data by rolling out policies from scratch, which inherits similar limitations to naïve online  
 44 RL methods in problems where data collection is expensive or dangerous. Overall, these results  
 45 suggest that it is challenging to devise an offline RL algorithm that both acquires a good initialization  
 46 from prior data and also enables efficient fine-tuning.

47 How can we devise a method to learn an effective policy initialization that also improves during  
 48 fine-tuning? Prior work [32, 6] shows that one can learn a good offline initialization by optimizing  
 49 the policy against a *conservative* value function obtained from an offline dataset. But, as we show in  
 50 Section 4.1, conservatism alone is insufficient for efficient online fine-tuning. Conservative methods  
 51 often tend to “unlearn” the policy initialization learned from offline data and waste samples collected  
 52 via online interaction in recovering this initialization. We find that the “unlearning” phenomenon is a  
 53 consequence of the fact that value estimates produced via conservative methods can be significantly  
 54 lower than the ground-truth return of *any* valid policy. Having Q-value estimates that do not lie  
 55 on a similar scale as the return of a valid policy is problematic. Because once fine-tuning begins,  
 56 actions executed in the environment for exploration that are actually worse than the policy learned  
 57 from offline data could erroneously appear better, if their ground-truth return value is larger than the  
 58 learned conservative value estimate. Hence, subsequent policy optimization will degrade the policy  
 59 performance until the method recovers.

60 If we can ensure that the conservative value estimates learned using the offline data are *calibrated*,  
 61 meaning that these estimates are on a similar scale as the true return values, then we can avoid the  
 62 unlearning phenomenon caused by conservative methods (see the formal definition in 4.1). Of course,  
 63 we cannot enforce such a condition perfectly, since it would require eliminating all errors in the value  
 64 function. Instead, we devise a method for ensuring that the learned values upper bound the true values  
 65 of some *reference policy* whose values can be estimated more easily (e.g., the behavior policy), while  
 66 still lower bounding the values of the learned policy. Though this does not perfectly ensure that the  
 67 learned values are correct, we show that it still leads to sample-efficient online fine-tuning. Thus,  
 68 our practical method, **calibrated Q-learning (Cal-QL)**, learns conservative value functions that are  
 69 “calibrated” against the behavior policy, via a simple modification to existing conservative methods.

70 The main contribution of this paper is Cal-QL, a method for acquiring an offline initialization that  
 71 facilitates online fine-tuning. Cal-QL aims to learn conservative value functions that are calibrated  
 72 with respect to a reference policy (e.g., the behavior policy). Our analysis of Cal-QL shows that  
 73 Cal-QL attains stronger guarantees on cumulative regret during fine-tuning. In practice, Cal-QL  
 74 can be implemented on top of conservative Q-learning [32], a prior offline RL method, without  
 75 any additional hyperparameters. We evaluate Cal-QL across a range of benchmark tasks from [10],  
 76 [51] and [44], including robotic manipulation and navigation. We show that Cal-QL matches or  
 77 outperforms the best methods on all tasks, in some cases by 30-40%.

## 78 2 Related Work

79 Several prior works suggest that online RL methods typically require a large number of samples [50,  
 80 54, 61, 26, 64, 18, 38] to learn from scratch. We can utilize offline data to accelerate online  
 81 RL algorithms. Prior works do this in a variety of ways: incorporating the offline data into the  
 82 replay buffer of online RL [48, 53, 23, 52], utilizing auxiliary behavioral cloning losses with policy  
 83 gradients [46, 27, 67, 66], or extracting a high-level skill space for downstream online RL [17, 1].  
 84 While these methods improve the sample efficiency of online RL from scratch, as we will also show  
 85 in our results, they do not eliminate the need to actively roll out poor policies for data collection.

86 To address this issue, a different line of work first runs offline RL for learning a good policy and value  
 87 initialization from the offline data, followed by online fine-tuning [45, 30, 41, 3, 56, 36, 42]. These  
 88 approaches typically employ offline RL methods based on policy constraints or pessimism [12, 49, 16,  
 89 15, 30, 51, 36] on the offline data, then continue training with the same method on a combination of  
 90 offline and online data once fine-tuning begins [43, 28, 62, 32, 4]. Although pessimism is crucial for  
 91 offline RL [25, 6], using pessimism or constraints for fine-tuning [45, 30, 41] slows down fine-tuning  
 92 or leads to initial unlearning, as we will show in Section 4.1. In effect, these prior methods either  
 93 fail to improve as fast as online RL or lose the initialization from offline RL. We aim to address this  
 94 limitation by understanding some conditions on the offline initialization that enable fast fine-tuning.

95 Our work is most related to methods that utilize a pessimistic RL algorithm for offline training but  
 96 incorporate exploration in fine-tuning [36, 42, 56]. In contrast to these works, our method aims to

learn a better offline initialization that enables standard online fine-tuning. Our approach fine-tunes naïvely without ensembles [36] or exploration [42] and, as we show in our experiments, this alone is enough to outperform approaches that employ explicit optimism during data collection.

### 3 Preliminaries and Background

The goal in RL is to learn the optimal policy for an MDP  $\mathcal{M} = (\mathcal{S}, \mathcal{A}, P, r, \rho, \gamma)$ .  $\mathcal{S}, \mathcal{A}$  denote the state and action spaces.  $P(s'|s, a)$  and  $r(s, a)$  are the dynamics and reward functions.  $\rho(s)$  denotes the initial state distribution.  $\gamma \in (0, 1)$  denotes the discount factor. Formally, the goal is to learn a policy  $\pi : \mathcal{S} \mapsto \mathcal{A}$  that maximizes cumulative discounted value function, denoted by  $V^\pi(s) = \frac{1}{1-\gamma} \sum_t \mathbb{E}_{a_t \sim \pi(s_t)} [\gamma^t r(s_t, a_t) | s_0 = s]$ . The Q-function of a given policy  $\pi$  is defined as  $Q^\pi(s, a) = \frac{1}{1-\gamma} \sum_t \mathbb{E}_{a_t \sim \pi(s_t)} [\gamma^t r(s_t, a_t) | s_0 = s, a_0 = a]$ , and we use  $Q_\theta^\pi$  to denote the estimate of the Q-function of a policy  $\pi$  as obtained via a neural network with parameters  $\theta$ .

Given access to an offline dataset  $\mathcal{D} = \{(s, a, r, s')\}$  collected using a behavior policy  $\pi_\beta$ , we aim to first train a good policy and value function using the offline dataset  $\mathcal{D}$  alone, followed by an online phase that utilizes online interaction in  $\mathcal{M}$ . Our goal during fine-tuning is to obtain the optimal policy with the smallest number of online samples. This can be expressed as minimizing the

**cumulative regret** over rounds of online interaction:  $\text{Reg}(K) := \mathbb{E}_{s \sim \rho} \sum_{k=1}^K [V^*(s) - V^{\pi^k}(s)]$ .

As we demonstrate in Section 7, existing methods face challenges in this setting.

Our approach will build on the conservative Q-learning (CQL) [32] algorithm. CQL imposes an additional regularizer that penalizes the learned Q-function on out-of-distribution (OOD) actions while compensating for this pessimism on actions seen within the training dataset. Assuming that the value function is represented by a function,  $Q_\theta$ , the training objective of CQL is given by

$$\min_{\theta} \underbrace{\alpha (\mathbb{E}_{s \sim \mathcal{D}, a \sim \pi} [Q_\theta(s, a)] - \mathbb{E}_{s, a \sim \mathcal{D}} [Q_\theta(s, a)])}_{\text{Conservative regularizer } \mathcal{R}(\theta)} + \frac{1}{2} \mathbb{E}_{s, a, s' \sim \mathcal{D}} [(Q_\theta(s, a) - \mathcal{B}^\pi \bar{Q}(s, a))^2], \quad (3.1)$$

where  $\mathcal{B}^\pi \bar{Q}(s, a)$  is the backup operator applied to a delayed target Q-network,  $\bar{Q}: \mathcal{B}^\pi \bar{Q}(s, a) := r(s, a) + \gamma \mathbb{E}_{a' \sim \pi(a'|s')} [\bar{Q}(s', a')]$ . The second term is the standard TD error [40, 13, 20]. The first term  $\mathcal{R}(\theta)$  (in blue) is a conservative regularizer that aims to prevent overestimation in the Q-values for OOD actions by minimizing the Q-values under the policy  $\pi(a|s)$ , and counterbalances by maximizing the Q-values of the actions in the dataset following the behavior policy  $\pi_\beta$ .

### 4 When Can Offline RL Initializations Enable Fast Online Fine-Tuning?

A starting point for offline pre-training and online fine-tuning is to simply initialize the value function with one that is produced by an existing offline RL method and then perform fine-tuning. However, we empirically find that initializations learned by many offline RL algorithms can perform poorly during fine-tuning. We will study the reasons for this poor performance for the subset of conservative methods to motivate and develop our approach for online fine-tuning, calibrated Q-learning.

#### 4.1 Empirical Analysis

Offline RL followed by online fine-tuning typically poses non-trivial challenges for a variety of methods. While analysis in prior work [45] notes challenges for a subset of offline RL methods, in Figure 2, we evaluate the fine-tuning performance of a variety of prior offline RL methods (CQL [32], IQL [30], TD3+BC [11], AWAC [45]) on a particular diagnostic instance of a visual pick-and-place task with a distractor object and sparse binary rewards [51], and find that all methods struggle to attain the best possible performance, quickly. More details about this task are in Appendix D.

While the offline Q-function initialization obtained from all methods attains a similar (normalized) return of around 0.5, they suffer from difficulties during fine-tuning: TD3+BC, IQL, AWAC attain slow asymptotic performance and CQL unlearns the offline initialization, followed by spending a large amount of online interaction to recover the offline performance again, before any further improvement. This initial unlearning appears in multiple tasks as we show in Appendix H. In this work, we focus on developing effective fine-tuning strategies on top of conservative methods like CQL. To do so, we next aim to understand the potential reason behind the initial unlearning in CQL.

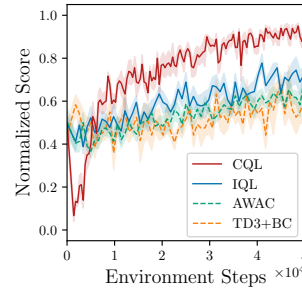

Figure 2: **Multiple prior offline RL algorithms suffer from difficulties** during fine-tuning including poor asymptotic performance and initial unlearning.

#### Why does CQL unlearn initially?

To understand why CQL unlearns initially, we inspect the learned Q-values averaged over the dataset in Figure 3. Observe that the Q-values learned by CQL in the offline phase are *much* smaller than their ground-truth value (as expected), but these Q-values drastically jump and adjust in scale when fine-tuning begins. In fact, we observe that performance recovery (red segment in Figure 3) *coincides* with a period where the range of Q-values changes to match the true range. This

is as expected: as a conservative Q-function experiences new online data, actions much worse than the offline policy on the rollout states appear to attain higher rewards compared to the highly underestimated offline Q-function, which in turn deceives the policy optimizer into unlearning the initial policy. We illustrate this idea visually in Figure 4. Once the Q-function has adjusted and the range of Q-values closely matches the true range, then fine-tuning can proceed normally, after the dip.

**To summarize**, our empirical analysis indicates that methods existing fine-tuning methods suffer from difficulties such as initial unlearning or poor asymptotic performance. In particular, we observed that conservative methods can attain good asymptotic performance, but “waste” samples to correct the learned Q-function. Thus, in this paper, we attempt to develop a good fine-tuning method that builds on top of an existing conservative offline RL method, CQL, but aims to “calibrate” the Q-function so that the initial dip in performance can be avoided.

#### 4.2 Conditions on the Offline Initialization that Enable Fast Fine-Tuning

Our observations from the preceding discussion motivate two conclusions in regard to the offline Q-initialization for fast fine-tuning: (a) methods that learn **conservative** Q-functions can attain good asymptotic performance, and (b) if the learned Q-values closely match the range of ground-truth Q-values on the task, then online fine-tuning does not need to devote samples to unlearn and then recover the offline initialization. One approach to formalize this intuition of Q-values lying on a similar scale as the ground-truth Q-function is via the requirement that the conservative Q-values learned by the conservative offline RL method must be lower-bounded by the ground-truth Q-value of a sub-optimal reference policy. This will prevent conservatism from learning overly small Q-values. We will refer to this property as “calibration” with respect to the reference policy.

**Definition 4.1** (Calibration). *An estimated Q-function  $Q_\theta^\pi$  for a given policy  $\pi$  is said to be calibrated with respect to a reference policy  $\mu$  if  $\mathbb{E}_{a \sim \pi} [Q_\theta^\pi(s, a)] \geq \mathbb{E}_{a \sim \mu} [Q^\mu(s, a)] := V^\mu(s), \forall s \in D$ .*

If the learned Q-function  $Q_\theta^\pi$  is calibrated with respect to a policy  $\mu$  that is worse than  $\pi$ , it would prevent unlearning during fine-tuning that we observed in the case of CQL. This is because the policy optimizer would not unlearn  $\pi$  in favor of a policy that is worse than the reference policy  $\mu$  upon observing new online data as the expected value of  $\pi$  is constrained to be larger than  $V^\mu$ :  $\mathbb{E}_{a \sim \pi} [Q_\theta^\pi(s, a)] \geq V^\mu(s)$ . Our practical approach Cal-QL will enforce calibration with respect to a policy  $\mu$  whose ground-truth value,  $V^\mu(s)$ , can be estimated reliably without bootstrapping error (e.g., the behavior policy induced by the dataset). This is the key idea behind our method (as we will discuss next) and is visually illustrated in Figure 4.

### 5 Cal-QL: Calibrated Q-Learning

Our approach, calibrated Q-learning (Cal-QL) aims to learn a conservative and calibrated value function initializations from an offline dataset. To this end, Cal-QL builds on CQL [32] and then constrains the learned Q-function to produce Q-values larger than the Q-value of a reference policy  $\mu$  per Definition 4.1. In principle, our approach can utilize many different choices of reference policies, but for developing a practical method, we simply utilize the behavior policy as our reference policy.

**Calibrating CQL.** We can constrain the learned Q-function  $Q_\theta^\pi$  to be larger than  $V^\mu$  via a simple change to the CQL training objective shown in Equation 3.1: masking out the push down of the learned Q-value on out-of-distribution (OOD) actions in CQL if the Q-function is not calibrated, i.e., if  $\mathbb{E}_{a \sim \pi} [Q_\theta^\pi(s, a)] \leq V^\mu(s)$ . Cal-QL modifies the CQL regularizer,  $\mathcal{R}(\theta)$  in this manner:

$$\mathbb{E}_{s \sim \mathcal{D}, a \sim \pi} [\max(Q_\theta(s, a), V^\mu(s))] - \mathbb{E}_{s, a \sim \mathcal{D}} [Q_\theta(s, a)], \quad (5.1)$$

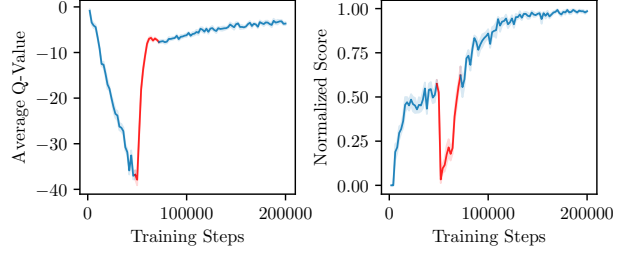

Figure 3: **The evolution of the average Q-value and the success rate of CQL over the course of offline pre-training and online fine-tuning.** Fine-tuning begins at 50K steps. The red-colored part denotes the period of performance recovery which also coincides with the period of Q-value adjustment.

where the changes from standard CQL are depicted in red. As long as  $\alpha$  (in Equation 3.1) is large, for any state-action pair where the learned Q-value is smaller than  $Q^\mu$ , the Q-function in Equation 5.1 will upper bound  $Q^\mu$  in a tabular setting. Of course, as with any practical RL method, with function approximators and gradient-based optimizers, we cannot guarantee that we can enforce this condition for every state-action pair, but in our experiments, we find that Equation 5.1 is sufficient to enforce the calibration in expectation over the states in the dataset.

## Pseudo-code and implementation details.

Our implementation of Cal-QL directly builds on the implementation of CQL from Geng [14]. We present a pseudo-code for Cal-QL in Algorithm 1. Additionally, we list the hyperparameters  $\alpha$  for the CQL algorithm and our baselines for each suite of tasks in Appendix E. Following the protocol in prior work [30, 52], the practical implementation of Cal-QL trains on a mixture of the offline data and the new online data, weighted in some proportion during fine-tuning. To get  $V^\mu(s)$ , we can fit a function approximator  $Q_\theta^\mu$  or  $V_\theta^\mu$  to the return-to-go values via regression, but we observed that also simply utilizing the return-to-go estimates for tasks that end in a terminal was sufficient for our use case. We show in Section 7, how this simple *one-line* change to the objective drastically improves over prior fine-tuning results.

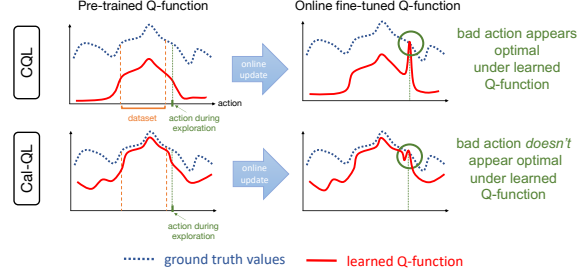

**Figure 4: Intuition behind policy unlearning with CQL and the idea behind Cal-QL.** The plot visualizes a slice of the learned Q-function and the ground-truth values for a given state. Erroneous peaks on suboptimal actions (x-axis) arise when updating CQL Q-functions with online data. This in turn can lead the policy to deviate away from high-reward actions covered by the dataset in favor of erroneous new actions, resulting in deterioration of the pre-trained policy. In contrast, Cal-QL corrects the scale of the learned Q-values by using a reference value function, such that actions with worse Q-values than the reference value function do not erroneously appear optimal in fine-tuning.

## 6 Theoretical Analysis of Cal-QL

We will now analyze the cumulative regret attained over online fine-tuning, when the value function is pre-trained with Cal-QL, and show that enforcing calibration (Definition 4.1) leads to a favorable regret bound during the online phase. Our analysis utilizes tools from Song et al. [52], but studies the impact of calibration on fine-tuning. We also remark that we simplify the treatment of certain aspects (e.g., how to incorporate pessimism) as it allows us to cleanly demonstrate benefits of calibration.

**Notation & terminology.** In our analysis, we will consider an idealized version of Cal-QL for simplicity. Specifically, following prior work [52] under the bilinear model [9], we will operate in a finite-horizon setting with a horizon  $H$ . We denote the learned Q-function at each learning iteration  $k$  for a given  $(s, a)$  pair and time-step  $h$  by  $Q_\theta^k(s, a)$ . For any given policy  $\pi$ , let  $C_\pi \geq 1$

denote the concentrability coefficient such that  $C_\pi := \max_{f \in \mathcal{C}} \frac{\sum_{h=0}^{H-1} \mathbb{E}_{s,a \sim d_h^\pi} [\mathcal{T}f_{h+1}(s,a) - f_h(s,a)]}{\sqrt{\sum_{h=0}^{H-1} \mathbb{E}_{s,a \sim \nu_h} (\mathcal{T}f_{h+1}(s,a) - f_h(s,a))^2}}$ ,

i.e., a coefficient that quantifies the distribution shift between the policy  $\pi$  and the dataset  $\mathcal{D}$ , in terms of the ratio of Bellman errors averaged under  $\pi$  and the dataset  $\mathcal{D}$ . Note that  $\mathcal{C}$  represents the Q-function class and we assume  $\mathcal{C}$  has a bellman-bilinear rank [9] of  $d$ . We also use  $C_\pi^\mu$  to denote the concentrability coefficient over a subset of *calibrated* Q-functions w.r.t. a reference policy

$\mu$ :  $C_\pi^\mu := \max_{f \in \mathcal{C}, f(s,a) \geq Q^\mu(s,a)} \frac{\sum_{h=0}^{H-1} \mathbb{E}_{s,a \sim d_h^\pi} [\mathcal{T}f_{h+1}(s,a) - f_h(s,a)]}{\sqrt{\sum_{h=0}^{H-1} \mathbb{E}_{s,a \sim \nu_h} (\mathcal{T}f_{h+1}(s,a) - f_h(s,a))^2}}$ , which provides  $C_\pi^\mu \leq C_\pi$ .

Similar to  $\mathcal{C}$ , let  $d_\mu$  denote the bellman bilinear rank of  $\mathcal{C}_\mu$  – the calibrated Q-function class w.r.t. the reference policy  $\mu$ . Intuitively, we have  $\mathcal{C}_\mu \subset \mathcal{C}$ , which implies that  $d_\mu \leq d$ . The formal definitions are provided in Appendix B.2. We will use  $\pi^k$  to denote the arg-max policy induced by  $Q_\theta^k$ .

**Intuition.** We intuitively discuss how calibration and conservatism enable Cal-QL to attain a smaller regret compared to not imposing calibration. Our goal is to bound the cumulative regret of online fine-tuning,  $\sum_k \mathbb{E}_{s_0 \sim \rho} [V^{\pi^*}(s_0) - V^{\pi^k}(s_0)]$ . We can decompose this expression into two terms:

$$\text{Reg}(K) = \underbrace{\sum_{k=1}^K \mathbb{E}_{s_0 \sim \rho} [V^*(s_0) - \max_a Q_\theta^k(s_0, a)]}_{(i) := \text{miscalibration}} + \underbrace{\sum_{k=1}^K \mathbb{E}_{s_0 \sim \rho} [\max_a Q_\theta^k(s_0, a) - V^{\pi^k}(s_0)]}_{(ii) := \text{overestimation}}. \quad (6.1)$$



This decomposition of regret into terms (i) and (ii) is instructive. Term (ii) corresponds to the amount of over-estimation in the learned value function, which is expected to be small if a conservative RL algorithm is used for training. Term (i) is the difference between the ground-truth value of the optimal policy and the learned Q-function and is negative if the learned Q-function were calibrated against the optimal policy (per Definition 4.1). Of course, this is not always possible because we do not know  $V^*$  a priori. But note that when Cal-QL utilizes a reference policy  $\mu$  with a high value  $V^\mu$ , close to  $V^*$ , then the learned Q-function  $Q_\theta$  is calibrated with respect to  $Q^\mu$  per Condition 4.1 and term (i) can still be controlled. Therefore, controlling this regret requires striking a balance between learning a calibrated (term (i)) and conservative (term (ii)) Q-function. We now formalize this intuition and defer the detailed proof to Appendix B.6.

**Theorem 6.1** (Informal regret bound of Cal-QL). *With high probability, Cal-QL obtains the following bound on total regret accumulated during online fine-tuning:*

$$\text{Reg}(K) = \tilde{O}\left(\min\left\{C_{\pi^*}^\mu H \sqrt{dK \log(|\mathcal{F}|)}, K\mathbb{E}_\rho[V^*(s_0) - V^\mu(s_0)] + H\sqrt{d_\mu K \log(|\mathcal{F}|)}\right\}\right),$$

where  $\mathcal{F}$  is the functional class of the Q-function.

**Comparison to Song et al. [52].** Song et al. [52] analyzes an online RL algorithm that utilizes offline data without imposing conservatism or calibration. We now compare Theorem 6.1 to Theorem 1 of Song et al. [52] to understand the impact of these conditions on the final regret guarantee. Theorem 1 of Song et al. [52] presents a regret bound:  $\text{Reg}(K) = \tilde{O}\left(C_{\pi^*} H \sqrt{dK \log(|\mathcal{F}|)}\right)$  and we note some improvements in our guarantee, that we also verify via experiments in Section 7.3: **(a)** for the setting where the reference policy  $\mu$  contains near-optimal behavior, i.e.,  $V^* - V^\mu \lesssim O(H\sqrt{d \log(|\mathcal{F}|)/K})$ , Cal-QL can enable a tighter regret guarantee compared to Song et al. [52]; **(b)** as we show in Appendix B.3, the concentrability coefficient  $C_{\pi^*}^\mu$  appearing in our guarantee is no larger than the one that appears in Theorem 1 of Song et al. [52], providing another source of improvement; and **(c)** finally, in the case where the reference policy has broad coverage and is highly sub-optimal, Cal-QL reverts back to the guarantee from [52], meaning that Cal-QL improves upon this prior work.

## 7 Experimental Evaluation

The goal of our experimental evaluation is to study how well Cal-QL can facilitate sample-efficient online fine-tuning. To this end, we compare Cal-QL with several other state-of-the-art fine-tuning methods on a variety of offline RL benchmark tasks from D4RL [10], Singh et al. [51], and Nair et al. [45], evaluating performance before and after fine-tuning. We also study the effectiveness of Cal-QL on higher-dimensional tasks, where the policy and value function must process raw image observations. Finally, we perform empirical studies to understand the efficacy of Cal-QL with different dataset compositions and the impact of errors in the reference value function estimation.

**Offline RL tasks and datasets.** We evaluate Cal-QL on a number of benchmark tasks and datasets used by prior works [30, 45] to evaluate fine-tuning performance: **(1)** The AntMaze tasks from D4RL [10] that require controlling an ant quadruped robot to navigate from a starting point to a desired goal location in a maze. The reward is +1 if the agent reaches within a pre-specified small radius around the goal and 0 otherwise. **(2)** The FrankaKitchen tasks from D4RL require controlling a 9-DoF Franka robot to attain a desired configuration of a kitchen. To succeed, a policy must complete four sub-tasks in the kitchen within a single rollout, and it receives a binary reward of +1/0 for every sub-task it completes. **(3)** Three Adroit dexterous manipulation tasks [47, 30, 45] that require learning complex manipulation skills on a 28-DoF five-fingered hand to **(a)** manipulate a pen in-hand to a desired configuration (pen-binary), **(b)** open a door by unlatching the handle (door-binary), and **(c)** relocating a ball to a desired location (relocate-binary). The agent obtains a sparse binary +1/0 reward if it succeeds in solving the task. Each of these tasks only provides a narrow offline dataset consisting of 25 demonstrations collected via human teleoperation and additional trajectories collected by a BC policy. Finally, to evaluate the efficacy of Cal-QL on a task where we learn from raw visual observations, we study **(4)** a pick-and-place task from prior work [51, 34] that requires learning to pick a ball and place it in a bowl, in the presence of distractors.

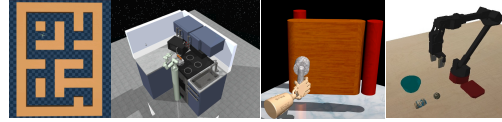

Figure 5: **Tasks:** We evaluate Cal-QL on a diverse set of benchmark problems: AntMaze and FrankaKitchen domains from [10], Adroit tasks from [45] and a vision-based robotic manipulation task from [34].

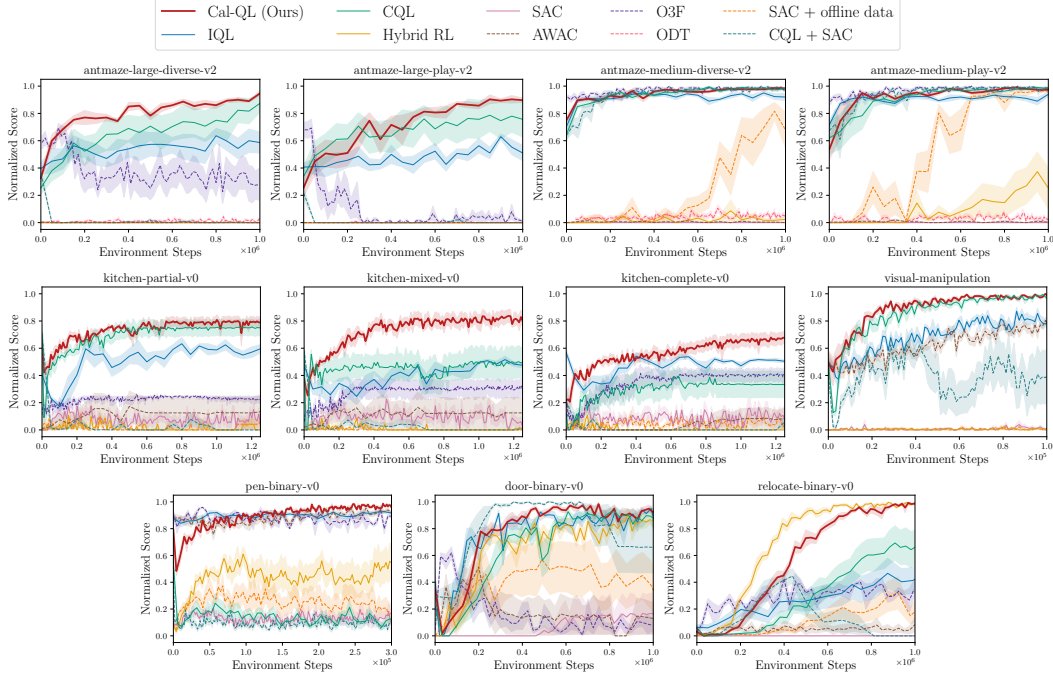

Figure 6: **Online fine-tuning after offline initialization on the benchmark tasks.** The plots show the online fine-tuning phase *after* pre-training for each method (except SAC-based approaches which are not pre-trained). Observe that Cal-QL consistently matches or exceeds the speed and final performance of the best prior method and is the only algorithm to do so across all tasks. (6 seeds)

**Comparisons, prior methods, and evaluation protocol.** We compare Cal-QL to running online SAC [21] from scratch, as well as prior approaches that leverage offline data. This includes naïvely fine-tuning offline RL methods such as CQL [32] and IQL [30], as well as fine-tuning with AWAC [45], O3F [42] and online decision transformer (ODT) [65], methods specifically designed for offline RL followed by online fine-tuning. In addition, we also compare to a baseline that trains SAC [21] using both online data and offline data (denoted by “SAC + offline data”) that mimics DDPGfD [53] but utilizes SAC instead of DDPG. We also compare to Hybrid RL [52], a recently proposed method that improves the sample efficiency of the “SAC + offline data” approach, and “CQL+SAC”, which first pre-train with CQL and then run fine-tuning with SAC on a mixture of offline and online data without conservatism. More details of each method can be found in Appendix E. We present learning curves for online fine-tuning and also quantitatively evaluate each method on its ability to improve the initialization learned from offline data measured in terms of (i) final performance after a pre-defined number of steps per domain and (ii) the cumulative regret over the course of online fine-tuning. In Section 7.2, we run Cal-QL with a higher update-to-data (UTD) ratio and compare it to RLPD [2], a more sample-efficient version of “SAC + offline data”.

## 7.1 Empirical Results

We first present a comparison of Cal-QL in terms of the normalized performance before and after fine-tuning in Table 1 and the cumulative regret in a fixed number of online steps in Table 2. Following the protocol of [10], we normalize the average return values for each domain with respect to the highest possible return (+4 in FrankaKitchen; +1 in other tasks; see Appendix E.1 for more details).

**Cal-QL improves the offline initialization significantly.** Observe in Table 1 and Figure 6 that while the performance of offline initialization acquired by Cal-QL is comparable to that of other methods such as CQL and IQL, Cal-QL is able to improve over its offline initialization the most by **106.9%** in aggregate and achieve the best fine-tuned performance in **9 out of 11** tasks.

**Cal-QL enables fast fine-tuning.** Observe in Table 2 that Cal-QL achieves the smallest regret on **8 out of 11** tasks, attaining an average regret of 0.22 which improves over the next best method (IQL) by **42%**. Intuitively, this means that Cal-QL does not require running highly sub-optimal policies. In tasks such as relocate-binary, Cal-QL enjoys the fast online learning benefits associated with naïve online RL methods that incorporate the offline data in the replay buffer (SAC + offline data and Cal-QL are the only two methods to attain a score of  $\geq 90\%$  on this task) unlike prior offline RL methods. As shown in Figure 6, in the kitchen and antmaze domains, Cal-QL brings the benefits

of fast online learning together with a good offline initialization, improving drastically on the regret metric. Finally, observe that the initial unlearning at the beginning of fine-tuning with conservative methods observed in Section 4.1 is greatly alleviated in all tasks (see Appendix H for details).

| Task           | CQL            | IQL     | AWAC    | O3F            | ODT     | CQL+SAC        | Hybrid SRL  | SAC+od | SAC  | Cal-QL (Ours)   |
|----------------|----------------|---------|---------|----------------|---------|----------------|-------------|--------|------|-----------------|
| large-diverse  | 25 → 87        | 40 → 59 | 00 → 00 | 59 → 28        | 00 → 01 | 36 → 00        | → 00        | → 00   | → 00 | 33 → <b>95</b>  |
| large-play     | 34 → 76        | 41 → 51 | 00 → 00 | 68 → 01        | 00 → 00 | 21 → 00        | → 00        | → 00   | → 00 | 26 → <b>90</b>  |
| medium-diverse | 65 → <b>98</b> | 70 → 92 | 00 → 00 | 92 → 97        | 00 → 03 | 64 → <b>98</b> | → 02        | → 68   | → 00 | 75 → <b>98</b>  |
| medium-play    | 62 → 98        | 72 → 94 | 00 → 00 | 89 → <b>99</b> | 00 → 05 | 67 → 98        | → 25        | → 96   | → 00 | 54 → 97         |
| partial        | 71 → 75        | 40 → 60 | 01 → 13 | 11 → 22        | -       | 71 → 00        | → 00        | → 07   | → 03 | 67 → <b>79</b>  |
| mixed          | 56 → 50        | 48 → 48 | 02 → 12 | 06 → 33        | -       | 59 → 01        | → 01        | → 00   | → 02 | 38 → <b>80</b>  |
| complete       | 13 → 34        | 57 → 50 | 01 → 08 | 17 → 41        | -       | 21 → 06        | → 00        | → 05   | → 06 | 22 → <b>68</b>  |
| pen            | 55 → 13        | 88 → 92 | 88 → 92 | 91 → 89        | -       | 48 → 10        | → 54        | → 17   | → 11 | 79 → <b>99</b>  |
| door           | 22 → 88        | 41 → 88 | 29 → 13 | 04 → 08        | -       | 29 → 66        | → 88        | → 39   | → 17 | 35 → <b>92</b>  |
| relocate       | 06 → 69        | 06 → 45 | 06 → 08 | 03 → 35        | -       | 01 → 00        | → <b>99</b> | → 16   | → 00 | 03 → 98         |
| manipulation   | 50 → 97        | 49 → 81 | 50 → 73 | -              | -       | 42 → 41        | → 00        | → 01   | → 01 | 49 → <b>99</b>  |
| average        | 42 → 71        | 50 → 69 | 16 → 20 | 44 → 45        | 00 → 02 | 42 → 29        | → 24        | → 23   | → 04 | 44 → <b>90</b>  |
| improvement    | + 71.0%        | + 37.7% | + 23.7% | + 3.0%         | N/A     | - 30.3%        | N/A         | N/A    | N/A  | + <b>106.9%</b> |

Table 1: **Normalized score before & after online fine-tuning.** Observe that Cal-QL improves over the best prior fine-tuning method and attains a much larger performance improvement over the course of online fine-tuning. The numbers represent the normalized score out of 100 following the convention in [10].

| Task           | CQL  | IQL         | AWAC | O3F         | ODT  | CQL+SAC     | Hybrid RL   | SAC+od | SAC  | Cal-QL (Ours) |
|----------------|------|-------------|------|-------------|------|-------------|-------------|--------|------|---------------|
| large-diverse  | 0.35 | 0.46        | 1.00 | 0.62        | 0.98 | 0.99        | 1.00        | 1.00   | 1.00 | <b>0.20</b>   |
| large-play     | 0.32 | 0.52        | 1.00 | 0.91        | 1.00 | 0.99        | 1.00        | 1.00   | 1.00 | <b>0.28</b>   |
| medium-diverse | 0.06 | 0.08        | 0.99 | <b>0.03</b> | 0.95 | 0.06        | 0.98        | 0.77   | 1.00 | 0.05          |
| medium-play    | 0.09 | 0.10        | 0.99 | <b>0.04</b> | 0.96 | 0.06        | 0.90        | 0.47   | 1.00 | 0.07          |
| partial        | 0.31 | 0.49        | 0.89 | 0.78        | -    | 0.97        | 0.98        | 0.98   | 0.92 | <b>0.27</b>   |
| mixed          | 0.55 | 0.60        | 0.88 | 0.72        | -    | 0.97        | 0.99        | 1.00   | 0.91 | <b>0.27</b>   |
| complete       | 0.70 | 0.53        | 0.97 | 0.66        | -    | 0.99        | 0.99        | 0.96   | 0.91 | <b>0.44</b>   |
| pen            | 0.86 | <b>0.11</b> | 0.12 | 0.13        | -    | 0.90        | 0.56        | 0.75   | 0.87 | <b>0.11</b>   |
| door           | 0.36 | 0.25        | 0.81 | 0.82        | -    | <b>0.23</b> | 0.35        | 0.60   | 0.94 | <b>0.23</b>   |
| relocate       | 0.71 | 0.74        | 0.95 | 0.71        | -    | 0.86        | <b>0.30</b> | 0.89   | 1.00 | 0.43          |
| manipulation   | 0.15 | 0.32        | 0.38 | -           | -    | 0.61        | 1.00        | 1.00   | 0.99 | <b>0.11</b>   |
| average        | 0.41 | 0.38        | 0.82 | 0.54        | 0.97 | 0.69        | 0.82        | 0.86   | 0.96 | <b>0.22</b>   |

Table 2: **Cumulative regret averaged over the steps of fine-tuning.** The smaller the better and 1.00 is the worst. Cal-QL attains the smallest overall regret, achieving the best performance among 8 / 11 tasks.

## 7.2 Cal-QL With High Update-to-Data (UTD) Ratio

We can further enhance the online sample efficiency of Cal-QL by increasing the number of gradient steps per environment step made by the algorithm. The number of updates per environment step is usually called the update-to-data (UTD) ratio. In standard online RL, running off-policy Q-learning with a high UTD value (e.g., 20, compared to the typical value of 1) often results in challenges pertaining to overfitting [39, 5, 2, 8]. As expected, we noticed that running Cal-QL with a high UTD value also leads these overfitting challenges. To address these challenges in high UTD settings, we combine Cal-QL with the Q-function architecture in recent work, RLPD [2] (i.e., we utilized layer normalization in the Q-function and ensembles akin to [5]), that attempts to tackle overfitting challenges. Note that Cal-QL still first pre-trains on the offline dataset using Equation 5.1 followed by online fine-tuning, unlike RLPD that runs online RL right from the start. In Figure 7, we compare Cal-QL (UTD = 20) with RLPD [2] (UTD = 20) and also Cal-QL (UTD = 1) as a baseline. Observe that Cal-QL (UTD = 20) improves over Cal-QL (UTD = 1) and training from scratch (RLPD).

## 7.3 Understanding the Behavior of Cal-QL

In this section, we aim to understand the behavior of Cal-QL by performing controlled experiments that modify the dataset composition, and by investigating various metrics to understand the properties of scenarios where utilizing Cal-QL is especially important for online fine-tuning.

**Effect of data composition.** To understand the efficacy of Cal-QL with different data compositions, we ran it on a newly constructed fine-tuning task on the medium-size AntMaze domain with a low-coverage offline dataset, which is generated via a scripted controller that starts from a fixed initial position and navigates the ant to a fixed goal position. In Figure 8, we plot the performance of Cal-QL and baseline CQL (for comparison) on this task, alongside the trend of average Q-values over the course of offline pre-training (to the left of the dashed vertical line, before 250 training epochs) and online fine-tuning (to the right of the vertical dashed line, after 250 training epochs), and the trend of *bounding rate*, i.e., the fraction of transitions in the data-buffer for which the constraint in Cal-QL actively lower-bounds the learned Q-function with the reference value. For comparison, we also plot these quantities for a diverse dataset with high coverage on the task (we use the antmaze-medium-diverse from [10] as a representative diverse dataset) in Figure 8.



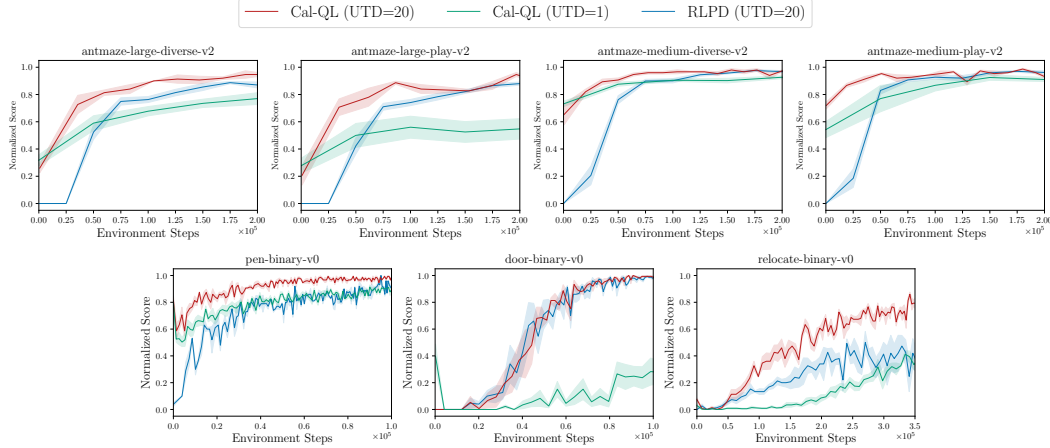

Figure 7: **Cal-QL with UTD=20.** Incorporating design choices from RLPD enables Cal-QL to achieve sample-efficient fine-tuning with UTD=20. Specifically, Cal-QL generally attains similar or higher asymptotic performance as RLPD, while also exhibiting a smaller cumulative regret.

Observe that for the diverse dataset, both naïve CQL and Cal-QL perform similarly, and indeed, the learned Q-values behave similarly for both of these methods. In this setting, online learning doesn't spend samples to correct the Q-function when fine-tuning begins leading to a low bounding rate, almost always close to 0. Instead, with the narrow dataset, we observe that the Q-values learned by naïve CQL are much smaller, and are corrected once fine-tuning begins. This correction co-occurs with a drop in performance (solid blue line on left), and naïve CQL is unable to recover from this drop. Cal-QL which calibrates the scale of the Q-function for many more samples in the dataset, stably transitions to online fine-tuning with no unlearning (solid red line on left).

This suggests that in settings with narrow datasets (e.g., in the experiment above and in the `adroit` and `visual-manipulation` domains from Figure 6), Q-values learned by naïve conservative methods are more likely to be smaller than the ground-truth Q-function of the behavior policy due to function approximation errors. Hence utilizing Cal-QL to calibrate the Q-function against the behavior policy can be significantly helpful. On the other hand, with significantly high-coverage datasets, especially in problems where the behavior policy is also random and sub-optimal, Q-values learned by naïve methods are likely to already be calibrated with respect to those of the behavior policy. Therefore no explicit calibration might be needed (and indeed, the bounding rate tends to be very close to 0 as shown in Figure 8). In this case, Cal-QL will revert back to standard CQL, as we observe in the case of the diverse dataset above. This intuition is also reflected in Theorem 6.1: when the reference policy  $\mu$  is close to a narrow, expert policy, we would expect Cal-QL to be especially effective in controlling the efficiency of online fine-tuning. **We also present a diagnostic study of Cal-QL when the reference value function is estimated by fitting a neural network in Appendix G,** and find that estimation errors in this model of the reference function do not affect performance significantly.

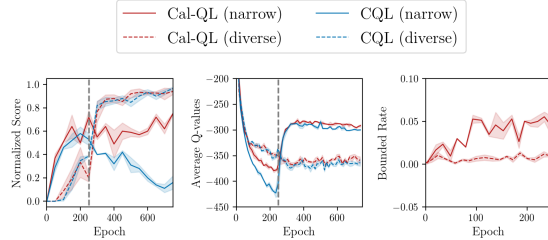

Figure 8: **Performance of Cal-QL with data compositions.** Cal-QL is most effective with narrow datasets, where Q-values need to be corrected at the beginning of fine-tuning.

## 8 Discussion, Future Directions, and Limitations

In this work we developed Cal-QL a method for acquiring conservative offline initializations that facilitate fast online fine-tuning. Cal-QL learns conservative value functions that are constrained to be larger than the value function of a reference policy. This form of calibration allows us to avoid initial unlearning when fine-tuning with conservative methods, while also retaining the effective asymptotic performance that these methods exhibit. Our theoretical and experimental results highlight the benefit of Cal-QL in enabling fast online fine-tuning. While Cal-QL outperforms prior methods, we believe that we can develop even more effective methods by adjusting calibration and conservatism more carefully. A limitation of our work is that we do not consider fine-tuning setups where pre-training and fine-tuning tasks are different, but this is an interesting avenue for future work.

## References

- [1] A. Ajay, A. Kumar, P. Agrawal, S. Levine, and O. Nachum. Opal: Offline primitive discovery for accelerating offline reinforcement learning. *arXiv preprint arXiv:2010.13611*, 2020.
- [2] P. J. Ball, L. Smith, I. Kostrikov, and S. Levine. Efficient online reinforcement learning with offline data. *arXiv preprint arXiv:2302.02948*, 2023.
- [3] A. Beeson and G. Montana. Improving td3-bc: Relaxed policy constraint for offline learning and stable online fine-tuning. *arXiv preprint arXiv:2211.11802*, 2022.
- [4] J. Buckman, C. Gelada, and M. G. Bellemare. The importance of pessimism in fixed-dataset policy optimization. *arXiv preprint arXiv:2009.06799*, 2020.
- [5] X. Chen, C. Wang, Z. Zhou, and K. W. Ross. Randomized ensembled double q-learning: Learning fast without a model. In *International Conference on Learning Representations*, 2021. URL <https://openreview.net/forum?id=AY8zfZm0tDd>.
- [6] C.-A. Cheng, T. Xie, N. Jiang, and A. Agarwal. Adversarially trained actor critic for offline reinforcement learning. *arXiv preprint arXiv:2202.02446*, 2022.
- [7] J. Devlin, M.-W. Chang, K. Lee, and K. Toutanova. Bert: Pre-training of deep bidirectional transformers for language understanding. *arXiv preprint arXiv:1810.04805*, 2018.
- [8] P. D’Oro, M. Schwarzer, E. Nikishin, P.-L. Bacon, M. G. Bellemare, and A. Courville. Sample-efficient reinforcement learning by breaking the replay ratio barrier. In *The Eleventh International Conference on Learning Representations*, 2023. URL <https://openreview.net/forum?id=0pC-9aBBVJe>.
- [9] S. Du, S. Kakade, J. Lee, S. Lovett, G. Mahajan, W. Sun, and R. Wang. Bilinear classes: A structural framework for provable generalization in rl. In *International Conference on Machine Learning*, pages 2826–2836. PMLR, 2021.
- [10] J. Fu, A. Kumar, O. Nachum, G. Tucker, and S. Levine. D4rl: Datasets for deep data-driven reinforcement learning. *arXiv preprint arXiv:2004.07219*, 2020.
- [11] S. Fujimoto and S. S. Gu. A minimalist approach to offline reinforcement learning. *arXiv preprint arXiv:2106.06860*, 2021.
- [12] S. Fujimoto, D. Meger, and D. Precup. Off-policy deep reinforcement learning without exploration. *arXiv preprint arXiv:1812.02900*, 2018.
- [13] S. Fujimoto, H. van Hoof, and D. Meger. Addressing function approximation error in actor-critic methods. In *International Conference on Machine Learning (ICML)*, pages 1587–1596, 2018.
- [14] X. Geng. Jaxcql: a simple implementation of sac and cql in jax. 2022. URL <https://github.com/young-geng/JaxCQL>.
- [15] S. K. S. Ghasemipour, D. Schuurmans, and S. S. Gu. Emaq: Expected-max q-learning operator for simple yet effective offline and online rl. In *International Conference on Machine Learning*, pages 3682–3691. PMLR, 2021.
- [16] Y. Guo, S. Feng, N. Le Roux, E. Chi, H. Lee, and M. Chen. Batch reinforcement learning through continuation method. In *International Conference on Learning Representations*, 2020.
- [17] A. Gupta, V. Kumar, C. Lynch, S. Levine, and K. Hausman. Relay policy learning: Solving long-horizon tasks via imitation and reinforcement learning. *arXiv preprint arXiv:1910.11956*, 2019.
- [18] A. Gupta, A. Pacchiano, Y. Zhai, S. M. Kakade, and S. Levine. Unpacking reward shaping: Understanding the benefits of reward engineering on sample complexity. *arXiv preprint arXiv:2210.09579*, 2022.
- [19] T. Haarnoja, A. Zhou, P. Abbeel, and S. Levine. Soft actor-critic: Off-policy maximum entropy deep reinforcement learning with a stochastic actor. In *arXiv*, 2018. URL <https://arxiv.org/pdf/1801.01290.pdf>.
- [20] T. Haarnoja, A. Zhou, K. Hartikainen, G. Tucker, S. Ha, J. Tan, V. Kumar, H. Zhu, A. Gupta, P. Abbeel, and S. Levine. Soft actor-critic algorithms and applications. Technical report, 2018.

- [21] T. Haarnoja, A. Zhou, K. Hartikainen, G. Tucker, S. Ha, J. Tan, V. Kumar, H. Zhu, A. Gupta, P. Abbeel, et al. Soft actor-critic algorithms and applications. *arXiv preprint arXiv:1812.05905*, 2018.
- [22] K. He, X. Chen, S. Xie, Y. Li, P. Dollár, and R. Girshick. Masked autoencoders are scalable vision learners. In *Proceedings of the IEEE/CVF Conference on Computer Vision and Pattern Recognition*, pages 16000–16009, 2022.
- [23] T. Hester, M. Vecerik, O. Pietquin, M. Lanctot, T. Schaul, B. Piot, D. Horgan, J. Quan, A. Sendonaris, I. Osband, et al. Deep q-learning from demonstrations. In *Thirty-Second AAAI Conference on Artificial Intelligence*, 2018.
- [24] C. Jin, Q. Liu, and S. Miryoosefi. Bellman eluder dimension: New rich classes of rl problems, and sample-efficient algorithms. *Advances in neural information processing systems*, 34: 13406–13418, 2021.
- [25] Y. Jin, Z. Yang, and Z. Wang. Is pessimism provably efficient for offline rl? In *International Conference on Machine Learning*, pages 5084–5096. PMLR, 2021.
- [26] S. Kakade and J. Langford. Approximately optimal approximate reinforcement learning. In *International Conference on Machine Learning (ICML)*, volume 2, 2002.
- [27] B. Kang, Z. Jie, and J. Feng. Policy optimization with demonstrations. In *International conference on machine learning*, pages 2469–2478. PMLR, 2018.
- [28] R. Kidambi, A. Rajeswaran, P. Netrapalli, and T. Joachims. Morel: Model-based offline reinforcement learning. *arXiv preprint arXiv:2005.05951*, 2020.
- [29] I. Kostrikov. JAXRL: Implementations of Reinforcement Learning algorithms in JAX, 10 2021. URL <https://github.com/ikostrikov/jaxrl>.
- [30] I. Kostrikov, A. Nair, and S. Levine. Offline reinforcement learning with implicit q-learning. *arXiv preprint arXiv:2110.06169*, 2021.
- [31] I. Kostrikov, J. Tompson, R. Fergus, and O. Nachum. Offline reinforcement learning with fisher divergence critic regularization. *arXiv preprint arXiv:2103.08050*, 2021.
- [32] A. Kumar, A. Zhou, G. Tucker, and S. Levine. Conservative q-learning for offline reinforcement learning. *arXiv preprint arXiv:2006.04779*, 2020.
- [33] A. Kumar, A. Singh, F. Ebert, Y. Yang, C. Finn, and S. Levine. Pre-Training for Robots: Offline RL Enables Learning New Tasks from a Handful of Trials. *arXiv e-prints*, art. arXiv:2210.05178, Oct. 2022. doi: 10.48550/arXiv.2210.05178.
- [34] A. Kumar, A. Singh, F. Ebert, Y. Yang, C. Finn, and S. Levine. Pre-training for robots: Offline rl enables learning new tasks from a handful of trials. *arXiv preprint arXiv:2210.05178*, 2022.
- [35] T. Lattimore and C. Szepesvári. *Bandit algorithms*. Cambridge University Press, 2020.
- [36] S. Lee, Y. Seo, K. Lee, P. Abbeel, and J. Shin. Offline-to-online reinforcement learning via balanced replay and pessimistic q-ensemble. In *Conference on Robot Learning*, pages 1702–1712. PMLR, 2022.
- [37] S. Levine, A. Kumar, G. Tucker, and J. Fu. Offline reinforcement learning: Tutorial, review, and perspectives on open problems. *arXiv preprint arXiv:2005.01643*, 2020.
- [38] Q. Li, Y. Zhai, Y. Ma, and S. Levine. Understanding the complexity gains of single-task rl with a curriculum. *arXiv preprint arXiv:2212.12809*, 2022.
- [39] Q. Li, A. Kumar, I. Kostrikov, and S. Levine. Efficient deep reinforcement learning requires regulating overfitting. In *The Eleventh International Conference on Learning Representations*, 2023. URL <https://openreview.net/forum?id=14-kr46GvP->.
- [40] T. P. Lillicrap, J. J. Hunt, A. Pritzel, N. Heess, T. Erez, Y. Tassa, D. Silver, and D. Wierstra. Continuous control with deep reinforcement learning. *arXiv preprint arXiv:1509.02971*, 2015.
- [41] J. Lyu, X. Ma, X. Li, and Z. Lu. Mildly conservative q-learning for offline reinforcement learning. *arXiv preprint arXiv:2206.04745*, 2022.
- [42] M. S. Mark, A. Ghadirzadeh, X. Chen, and C. Finn. Fine-tuning offline policies with optimistic action selection. In *Deep Reinforcement Learning Workshop NeurIPS 2022*, 2022.
- [43] O. Nachum, B. Dai, I. Kostrikov, Y. Chow, L. Li, and D. Schuurmans. Algaedice: Policy gradient from arbitrary experience. *arXiv preprint arXiv:1912.02074*, 2019.

- [44] A. Nair, M. Dalal, A. Gupta, and S. Levine. Accelerating online reinforcement learning with offline datasets. *CoRR*, abs/2006.09359, 2020. URL <https://arxiv.org/abs/2006.09359>.
- [45] A. Nair, M. Dalal, A. Gupta, and S. Levine. Accelerating online reinforcement learning with offline datasets. *arXiv preprint arXiv:2006.09359*, 2020.
- [46] A. Rajeswaran, V. Kumar, A. Gupta, G. Vezzani, J. Schulman, E. Todorov, and S. Levine. Learning complex dexterous manipulation with deep reinforcement learning and demonstrations. *arXiv preprint arXiv:1709.10087*, 2017.
- [47] A. Rajeswaran, V. Kumar, A. Gupta, G. Vezzani, J. Schulman, E. Todorov, and S. Levine. Learning complex dexterous manipulation with deep reinforcement learning and demonstrations. In *Robotics: Science and Systems*, 2018.
- [48] S. Schaal. Learning from demonstration. *Advances in neural information processing systems*, 9, 1996.
- [49] N. Y. Siegel, J. T. Springenberg, F. Berkenkamp, A. Abdolmaleki, M. Neunert, T. Lampe, R. Hafner, and M. Riedmiller. Keep doing what worked: Behavioral modelling priors for offline reinforcement learning. *arXiv preprint arXiv:2002.08396*, 2020.
- [50] D. Silver, A. Huang, C. J. Maddison, A. Guez, L. Sifre, G. Van Den Driessche, J. Schrittwieser, I. Antonoglou, V. Panneershelvam, M. Lanctot, et al. Mastering the game of go with deep neural networks and tree search. *nature*, 529(7587):484–489, 2016.
- [51] A. Singh, A. Yu, J. Yang, J. Zhang, A. Kumar, and S. Levine. Cog: Connecting new skills to past experience with offline reinforcement learning. *arXiv preprint arXiv:2010.14500*, 2020.
- [52] Y. Song, Y. Zhou, A. Sekhari, D. Bagnell, A. Krishnamurthy, and W. Sun. Hybrid RL: Using both offline and online data can make RL efficient. In *The Eleventh International Conference on Learning Representations*, 2023. URL <https://openreview.net/forum?id=yyBis80iUuU>.
- [53] M. Vecerik, T. Hester, J. Scholz, F. Wang, O. Pietquin, B. Piot, N. Heess, T. Rothörl, T. Lampe, and M. Riedmiller. Leveraging demonstrations for deep reinforcement learning on robotics problems with sparse rewards. *arXiv preprint arXiv:1707.08817*, 2017.
- [54] O. Vinyals, I. Babuschkin, W. M. Czarnecki, M. Mathieu, A. Dudzik, J. Chung, D. H. Choi, R. Powell, T. Ewalds, P. Georgiev, et al. Grandmaster level in starcraft ii using multi-agent reinforcement learning. *Nature*, 575(7782):350–354, 2019.
- [55] A. Wagenmaker and A. Pacchiano. Leveraging offline data in online reinforcement learning. *arXiv preprint arXiv:2211.04974*, 2022.
- [56] J. Wu, H. Wu, Z. Qiu, J. Wang, and M. Long. Supported policy optimization for offline reinforcement learning. *arXiv preprint arXiv:2202.06239*, 2022.
- [57] C. Xiao, H. Wang, Y. Pan, A. White, and M. White. The in-sample softmax for offline reinforcement learning. In *International Conference on Learning Representations*, 2023. URL <https://openreview.net/forum?id=u-RuvyDYqCM>.
- [58] T. Xie and N. Jiang. Q\* approximation schemes for batch reinforcement learning: A theoretical comparison. In *Conference on Uncertainty in Artificial Intelligence*, pages 550–559. PMLR, 2020.
- [59] T. Xie, C.-A. Cheng, N. Jiang, P. Mineiro, and A. Agarwal. Bellman-consistent pessimism for offline reinforcement learning. *Advances in neural information processing systems*, 34, 2021.
- [60] T. Xie, N. Jiang, H. Wang, C. Xiong, and Y. Bai. Policy finetuning: Bridging sample-efficient offline and online reinforcement learning. *Advances in neural information processing systems*, 34:27395–27407, 2021.
- [61] D. Ye, G. Chen, W. Zhang, S. Chen, B. Yuan, B. Liu, J. Chen, Z. Liu, F. Qiu, H. Yu, Y. Yin, B. Shi, L. Wang, T. Shi, Q. Fu, W. Yang, L. Huang, and W. Liu. Towards playing full moba games with deep reinforcement learning. In H. Larochelle, M. Ranzato, R. Hadsell, M. F. Balcan, and H. Lin, editors, *Advances in Neural Information Processing Systems*, volume 33, pages 621–632. Curran Associates, Inc., 2020. URL <https://proceedings.neurips.cc/paper/2020/file/06d5ae105ea1bea4d800bc96491876e9-Paper.pdf>.
- [62] T. Yu, G. Thomas, L. Yu, S. Ermon, J. Zou, S. Levine, C. Finn, and T. Ma. Mopo: Model-based offline policy optimization. *arXiv preprint arXiv:2005.13239*, 2020.



- 561 [63] A. Zanette, M. J. Wainwright, and E. Brunskill. Provable benefits of actor-critic methods  
562 for offline reinforcement learning. *Advances in neural information processing systems*, 34:  
563 13626–13640, 2021.
- 564 [64] Y. Zhai, C. Baek, Z. Zhou, J. Jiao, and Y. Ma. Computational benefits of intermediate rewards  
565 for goal-reaching policy learning. *Journal of Artificial Intelligence Research*, 73:847–896, 2022.
- 566 [65] Q. Zheng, A. Zhang, and A. Grover. Online decision transformer. In *International Conference*  
567 *on Machine Learning*, pages 27042–27059. PMLR, 2022.
- 568 [66] H. Zhu, A. Gupta, A. Rajeswaran, S. Levine, and V. Kumar. Dexterous manipulation with deep  
569 reinforcement learning: Efficient, general, and low-cost. In *2019 International Conference on*  
570 *Robotics and Automation (ICRA)*, pages 3651–3657. IEEE, 2019.
- 571 [67] Y. Zhu, Z. Wang, J. Merel, A. Rusu, T. Erez, S. Cabi, S. Tunyasuvunakool, J. Kramár, R. Hadsell,  
572 N. de Freitas, et al. Reinforcement and imitation learning for diverse visuomotor skills. *arXiv*  
573 *preprint arXiv:1802.09564*, 2018.

# 574 Appendices

## 575 A Implementation details of Cal-QL

576 Our algorithm, Cal-QL is illustrated in Algorithm 1. A complete implementation of the functions in  
577 python-style is provided in Appendix A.2.

### 578 A.1 Cal-QL Algorithm

579 We use  $J_Q(\theta)$  to denote the calibrated conservative regularizer for the Q network update:

$$J_Q(\theta) := \underbrace{\alpha (\mathbb{E}_{s \sim \mathcal{D}, a \sim \pi} [\max(Q_\theta(s, a), Q^\mu(s, a))] - \mathbb{E}_{s, a \sim \mathcal{D}} [Q_\theta(s, a)])}_{\text{Calibrated conservative regularizer } \mathcal{R}(\theta)} \quad (\text{A.1})$$

$$+ \frac{1}{2} \mathbb{E}_{s, a, s' \sim \mathcal{D}} [(Q_\theta(s, a) - \mathcal{B}^\pi \bar{Q}(s, a))^2]. \quad (\text{A.2})$$

---

#### Algorithm 1 Cal-QL pseudo-code

---

- 1: Initialize Q-function,  $Q_\theta$ , a policy,  $\pi_\phi$
- 2: **for** step  $t$  in  $\{1, \dots, N\}$  **do**
- 3:   Train the Q-function using the conservative regularizer  
in Eq. A.1:

$$\theta_t := \theta_{t-1} - \eta_Q \nabla_\theta J_Q(\theta) \quad (\text{A.3})$$

- 4:   Improve policy  $\pi_\phi$  with SAC-style update:

$$\phi_t := \phi_{t-1} + \eta_\pi \mathbb{E}_{s \sim \mathcal{D}, a \sim \pi_\phi(\cdot|s)} [Q_\theta(s, a) - \log \pi_\phi(a|s)] \quad (\text{A.4})$$

- 5: **end for**
- 

### 581 A.2 Python Implementation

Listing 1: Training Q networks given a batch of data

```

582 q_data = critic(batch['observations'], batch['actions'])
583
584 next_dist = actor(batch['next_observations'])
585 next_pi_actions, next_log_pis = next_dist.sample()
586
587 target_qval = target_critic(batch['observations'], next_pi_actions)
588 target_qval = batch['rewards'] + self.gamma * (1 - batch['dones']) * target_qval
589
590 td_loss = mse_loss(q_data, target_qval)
591
592 num_samples = 4
593 random_actions = uniform((num_samples, batch_size, action_dim), min=-1, max=1)
594 random_pi = 0.5 ** batch['actions'].shape[-1]
595
596 pi_actions, log_pis = actor(batch['observations'])
597
598 q_rand_is = critic(batch['observations'], random_actions) - random_pi
599 q_pi_is = critic(batch['observations'], pi_actions) - log_pis
600
601 # Cal-QL's modification
602 mc_return = batch['mc_return'].repeat(num_samples)
603 q_pi_is = max(q_pi_is, mc_return)
604
605 cat_q = concatenate([q_rand_is, q_pi_is], new_axis=True)
606 cat_q = logsumexp(cat_q, axis=0) # sum over num_samples
607 critic_loss = td_loss + ((cat_q - q_data).mean() * cql_alpha)
608
609 critic_optimizer.zero_grad()
610 critic_loss.backward()
611 critic_optimizer.step()
612

```

Listing 2: Training the policy (or the actor) given a batch of data

```

614 # return distribution of actions
615 pi_actions, log_pis = actor(batch['observations'])
616
617 # calculate q value of actor actions
618 qpi = critic(batch['observations'], actions)
619 qpi = qpi.min(axis=0)
620
621 # same objective as CQL (kumar et al.)
622 actor_loss = (log_pis * self.alpha - qpi).mean()
623
624 # optimize loss
625 actor_optimizer.zero_grad()
626 actor_loss.backward()
627 actor_optimizer.step()
628

```

## B Regret Analysis of Cal-QL

We provide a theoretical version of Cal-QL in Algorithm 2. Policy fine-tuning has been studied in different settings [60, 52, 55]. Our analysis largely adopts the settings and results in Song et al. [52], with additional changes in Assumption B.1, Assumption B.3, and Definition B.4. Note that the goal of this proof is to demonstrate that a *pessimistic functional class* (Assumption B.1) allows one to utilize the offline data efficiently, rather than providing a new analytical technique for regret analysis. See comparisons between Section B.3 and Section C.1. Note that we use  $f$  instead of  $Q_\theta$  in the main text to denote the estimated  $Q$  function for notation simplicity.

---

### Algorithm 2 Theoretical version of Cal-QL

---

- 1: **Input:** Value function class  $\mathcal{F}$ , # total iterations  $K$ , offline dataset  $\mathcal{D}_h^\nu$  of size  $m_{\text{off}}$  for  $h \in [H-1]$ .
  - 2: Initialize  $f_h^1(s, a) = 0, \forall(s, a)$ .
  - 3: **for**  $k = 1, \dots, K$  **do**
  - 4:   Let  $\pi^k$  be the greedy policy w.r.t.  $f^k$   $\triangleright$  I.e.,  $\pi_h^k(s) = \arg \max_a f_h^k(s, a)$ .
  - 5:   For each  $h$ , collect  $m_{\text{on}}$  online tuples  $\mathcal{D}_h^k \sim d_h^{\pi^k}$   $\triangleright$  online data collection
  - 6:   Set  $f_H^{k+1}(s, a) = 0, \forall(s, a)$ .
  - 7:   **for**  $h = H-1, \dots, 0$  **do**  $\triangleright$  FQI with offline and online data
  - 8:     Estimate  $f_h^{k+1}$  using **conservative** least squares on the aggregated data:  $\triangleright$  I.e., CQL regularized class  $\hat{\mathcal{C}}_h$
  - $$f_h^{k+1} \leftarrow \arg \min_{f \in \hat{\mathcal{C}}_h} \left\{ \widehat{\mathbb{E}}_{\mathcal{D}_h^\nu} \left[ f(s, a) - r - \max_{a'} f_{h+1}^{k+1}(s', a') \right]^2 + \sum_{\tau=1}^K \widehat{\mathbb{E}}_{\mathcal{D}_h^\tau} \left[ f(s, a) - r - \max_{a'} f_{h+1}^{k+1}(s', a') \right]^2 \right\} \quad (\text{B.1})$$
  - 9:      $f_h^{k+1} = \max\{f_h^{k+1}, Q_h^{\text{ref}}\}$   $\triangleright$  Set a reference policy for calibration (Definition 4.1)
  - 10:   **end for**
  - 11: **end for**
  - 12: **Output:**  $\pi^K$
- 

### B.1 Preliminaries

In this subsection, we follow most of the notations and definitions in Song et al. [52]. In particular, we consider the finite horizon cases, where the value function and Q function are defined as:

$$V_h^\pi(s) = \mathbb{E} \left[ \sum_{\tau=h}^{H-1} r_\tau | \pi, s_h = s \right] \quad (\text{B.2})$$

$$Q_h^\pi(s, a) = \mathbb{E} \left[ \sum_{\tau=h}^{H-1} r_\tau | \pi, s_h = s, a_h = a \right]. \quad (\text{B.3})$$

We also define the Bellman operator  $\mathcal{T}$  such that  $\forall f : \mathcal{S} \times \mathcal{A}$ :

$$\mathcal{T}f(s, a) = \mathbb{E}_{s,a}[R(s, a)] + \mathbb{E}_{s' \sim P(s,a)} \max_{a'} f(s', a'), \quad \forall(s, a) \in \mathcal{S} \times \mathcal{A}, \quad (\text{B.4})$$

where  $R(s, a) \in \Delta[0, 1]$  represents a stochastic reward function.

## 643 B.2 Notations

- 644 • Feature covariance matrix  $\Sigma_{k;h}$ :

$$\Sigma_{k;h} = \sum_{\tau=1}^k X_h(f^\tau)(X_h(f^\tau))^\top + \lambda \mathbf{I} \quad (\text{B.5})$$

- 645 • Matrix Norm Zanette et al. [63]: for a matrix  $\Sigma$ , the matrix norm  $\|\mathbf{u}\|_\Sigma$  is defined as:

$$\|\mathbf{u}\|_\Sigma = \sqrt{\mathbf{u}^\top \Sigma \mathbf{u}} \quad (\text{B.6})$$

- 646 • Weighted  $\ell^2$  norm: for a given distribution  $\beta \in \Delta(\mathcal{S} \times \mathcal{A})$  and a function  $f : \mathcal{S} \times \mathcal{A} \mapsto \mathbb{R}$ ,  
647 we denote the weighted  $\ell^2$  norm as:

$$\|f\|_{2,\beta}^2 := \mathbb{E}_{(s,a) \sim \beta} f^2(s, a) \quad (\text{B.7})$$

- 648 • A stochastic reward function  $R(s, a) \in \Delta([0, 1])$
- 649 • For each offline data distribution  $\nu = \{\nu_0, \dots, \nu_{H-1}\}$ , the offline data set at time step  $h$   
650 ( $\nu_h$ ) contains data samples  $(s, a, r, s')$ , where  $(s, a) \sim \nu_h, r \in R(s, a), s' \sim P(s, a)$ .
- 651 • Given a policy  $\pi := \{\pi_0, \dots, \pi_{H-1}\}$ , where  $\pi_h : \mathcal{S} \mapsto \Delta(\mathcal{A})$ ,  $d_h^\pi \in \Delta(s, a)$  denotes the  
652 state-action occupancy induced by  $\pi$  at step  $h$ .
- 653 • We consider the value-based function approximation setting, where we are given a function  
654 class  $\mathcal{C} = \mathcal{C}_0 \times \dots \times \mathcal{C}_{H-1}$  with  $\mathcal{C}_h \subset \mathcal{S} \times \mathcal{A} \mapsto [0, V_{\max}]$ .
- 655 • A policy  $\pi^f$  is defined as the greedy policy w.r.t.  $f: \pi_h^f(s) = \arg \max_a f_h(s, a)$ . Specifi-  
656 cally, at iteration  $k$ , we use  $\pi^k$  to denote the greedy policy w.r.t.  $f^k$ .

## 657 B.3 Assumptions and Definitions

658 **Assumption B.1** (Pessimistic Realizability and Completeness). *For any policy  $\pi^e$ , we say  $\mathcal{C}_h$  is*  
659 *a pessimistic function class w.r.t.  $\pi^e$ , if for any  $h$ , we have  $Q_h^{\pi^e} \in \mathcal{C}_h$ , and additionally, for any*  
660  *$f_{h+1} \in \mathcal{C}_{h+1}$ , we have  $\mathcal{T}f_{h+1} \in \mathcal{C}_h$  and  $f_h(s, a) \leq Q_h^{\pi^e}(s, a), \forall (s, a) \in \mathcal{S} \times \mathcal{A}$ .*

661 **Definition B.2** (Bilinear model Du et al. [9]). *We say that the MDP together with the function*  
662 *class  $\mathcal{F}$  is a bilinear model of rank  $d$  if for any  $h \in [H-1]$ , there exist two (known) mappings*  
663  *$X_h, W_h : \mathcal{F} \mapsto \mathbb{R}^d$  with  $\max_f \|X_h(f)\|_2 \leq B_X$  and  $\max_f \|W_h(f)\|_2 \leq B_W$  such that*

$$\forall f, g \in \mathcal{F} : \left| \mathbb{E}_{s,a \sim d_h^{\pi^f}} [g_h(s, a) - \mathcal{T}g_{h+1}(s, a)] \right| = |\langle X_h(f), W_h(g) \rangle|. \quad (\text{B.8})$$

664 **Assumption B.3** (Bilinear Rank of Reference Policies). *Suppose  $Q^{\text{ref}} \in \mathcal{C}_{\text{ref}} \subset \mathcal{C}$ , where  $\mathcal{C}_{\text{ref}}$  is the*  
665 *function class of our reference policy, we assume the Bilinear rank of  $\mathcal{C}_{\text{ref}}$  is  $d_{\text{ref}}$  and  $d_{\text{ref}} \leq d$ .*

666 **Definition B.4** (Calibrated Bellman error transfer coefficient). *For any policy  $\pi$ , we define the*  
667 *calibrated transfer coefficient w.r.t. to a reference policy  $\pi^{\text{ref}}$  as*

$$C_\pi^{\text{ref}} := \max_{f \in \mathcal{C}, f(s,a) \geq Q^{\text{ref}}(s,a)} \frac{\sum_{h=0}^{H-1} \mathbb{E}_{s,a \sim d_h^\pi} [\mathcal{T}f_{h+1}(s, a) - f_h(s, a)]}{\sqrt{\sum_{h=0}^{H-1} \mathbb{E}_{s,a \sim \nu_h} (\mathcal{T}f_{h+1}(s, a) - f_h(s, a))^2}}, \quad (\text{B.9})$$

668 where  $Q^{\text{ref}} = Q^{\pi^{\text{ref}}}$ .

## 669 B.4 Discussions on the Assumptions

670 The pessimistic realizability and completeness assumption (Assumption B.1) is motivated by some  
671 theoretical studies of the pessimistic offline methods [59, 6] with regularizers:

$$\min_{\theta} \underbrace{\alpha (\mathbb{E}_{s \sim \mathcal{D}, a \sim \pi} [Q_\theta(s, a)] - \mathbb{E}_{s, a \sim \mathcal{D}} [Q_\theta(s, a)])}_{\text{Conservative regularizer } \mathcal{R}(\theta)} + \frac{1}{2} \mathbb{E}_{s, a, s' \sim \mathcal{D}} \left[ (Q_\theta(s, a) - \mathcal{B}^\pi \bar{Q}(s, a))^2 \right]. \quad (\text{B.10})$$



672 Since the goal of the conservative regularizer  $\mathcal{R}(\theta)$  intrinsically wants to enforce

$$Q_\theta(s, \pi(s)) \leq Q_\theta(s, \pi^e(s)), \quad (\text{B.11})$$

673 where  $\pi$  is the training policy and  $\pi^e$  is the reference (behavior) policy. One can consider (B.10) as  
674 the Lagrange duality formulation of the following primal optimization problem:

$$\min_{\theta} \mathbb{E}_{s,a,s' \sim \mathcal{D}} \left[ (Q_\theta(s, a) - \mathcal{B}^\pi \bar{Q}(s, a))^2 \right], \text{ subject to } \mathbb{E}_{s \sim \mathcal{D}, a \sim \pi} [Q_\theta(s, a)] \leq \mathbb{E}_{s \sim \mathcal{D}, a \sim \pi^e} [Q_\theta(s, a)], \quad (\text{B.12})$$

675 where the constraint set is equivalent to Assumption B.1. Although Assumption B.1 directly  
676 characterizes the constraint set of the primal form of (B.10) the exact theoretical connection between  
677 the pessimistic realizability and the regularized bellman consistency equation is beyond the scope of  
678 this work and we would like to leave that for future studies.

679 Assumption B.1 allows us to restrict the functional class of interest to a smaller conservative function  
680 class  $\mathcal{C} \subset \mathcal{F}$ , which leads to a smaller Bellman rank of the reference policy ( $d_{\text{ref}} \leq d$ ) suggested  
681 in Assumption B.3, and a smaller concentrability coefficient ( $C_{\pi^e}^{\text{ref}} \leq C_\pi$ ) defined in Definition B.4,  
682 and C.2. Assumption B.3 and Definition C.2 provide the Bellman Bilinear rank and Bellman error  
683 transfer coefficient of the pessimistic functional class  $\mathcal{C}$  of interest.

## 684 B.5 Proof Structure Overview

685 We provide an overview of the proof structure and its dependency on different assumptions below:

- 686 • Theorem B.5: the total regret is decomposed into *offline regrets* and *online regrets*.
  - 687 – Bounding *offline regrets*, requiring Definition B.4 and the following lemmas:
    - 688 \* Performance difference lemma w.r.t. a comparator policy (Lemma C.5).
    - 689 \* Least square generalization bound (Lemma C.4), requiring Assumption B.1.
  - 690 – Bounding *online regrets*, requiring Definition B.2
    - 691 \* Performance difference lemma for the online error (Lemma C.6).
    - 692 \* Least square generalization bound (Lemma C.4), requiring Assumption B.1.
    - 693 \* Upper bounds with the bilinear model assumption (Lemma C.7).
    - 694 \* Applying Elliptical Potential Lemma [35] with bellman rank  $d$  and  $d_{\text{ref}}$
    - 695 (Lemma C.8), requiring Assumption B.3.

## 696 B.6 Our Results

697 **Theorem B.5** (Formal Result of Theorem 6.1). *Fix  $\delta \in (0, 1)$ ,  $m_{\text{off}} = K$ ,  $m_{\text{on}} = 1$ , suppose and the*  
698 *function class  $\mathcal{C}$  follows Assumption B.1 w.r.t.  $\pi^e$ . Suppose the underlying MDP admits Bilinear rank*  
699  *$d$  on function class  $\mathcal{C}$  and  $d_{\text{ref}}$  on  $\mathcal{C}_{\text{ref}}$ , respectively, then with probability at least  $1 - \delta$ , Algorithm 2*  
700 *obtains the following bound on cumulative suboptimality w.r.t. any comparator policy  $\pi^e$ :*

$$\sum_{t=1}^K V^{\pi^e} - V^{\pi^k} = \tilde{O} \left( \min \left\{ C_{\pi^e}^{\text{ref}} H \sqrt{dK \log(|\mathcal{F}|/\delta)}, K \left( V^{\pi^e} - V^{\text{ref}} \right) + H \sqrt{d_{\text{ref}} K \log(|\mathcal{F}|/\delta)} \right\} \right). \quad (\text{B.13})$$

701 Note that Theorem B.5 provides a guarantee for *any* comparator policy  $\pi^e$ , which can be directly  
702 applied to  $\pi^*$  described in our informal result (Theorem 6.1). We also change the notation for the  
703 reference policy from  $\mu$  in Theorem 6.1 to  $\pi^{\text{ref}}$  (similarly,  $d_{\text{ref}}$ ,  $V^{\text{ref}}$ ,  $C_{\pi^e}^{\text{ref}}$  correspond to  $d_\mu$ ,  $V^\mu$ ,  $C_{\pi^e}^\mu$   
704 in Theorem 6.1) for notation consistency in the proof. Our proof of Theorem B.5 largely follows the  
705 proof of Theorem 1 of [52], and the major changes are caused by Assumption B.1, Assumption B.3,  
706 and Definition B.4.

707 *Proof.* Let  $\mathcal{E}_k$  denote the event that  $\{f_0^k(s, a) \leq Q^{\text{ref}}(s, a)\}$  and  $\bar{\mathcal{E}}_k$  denote the event that  
 708  $\{f_0^k(s, a) > Q^{\text{ref}}(s, a)\}$ . Let  $V^{\text{ref}}(s) = \max_a Q^{\text{ref}}(s, a)$ , we start by noting that

$$\begin{aligned}
 & \sum_{k=1}^K V^{\pi^e} - V^{\pi^{f^k}} = \sum_{k=1}^K \mathbb{E}_{s \sim \rho} \left[ V_0^{\pi^e}(s) - V_0^{\pi^{f^k}}(s) \right] \\
 &= \underbrace{\sum_{k=1}^K \mathbb{E}_{s \sim \rho} \left[ \mathbb{1}\{\bar{\mathcal{E}}_k\} \left( V_0^{\pi^e}(s) - V^{\text{ref}}(s) \right) \right]}_{\Gamma_0} + \underbrace{\sum_{k=1}^K \mathbb{E}_{s \sim \rho} \left[ \mathbb{1}\{\bar{\mathcal{E}}_k\} \left( V^{\text{ref}}(s) - \max_a f_0^k(s, a) \right) \right]}_{=0, \text{ by the definition of } \mathcal{E}_k \text{ and line 9 of Algorithm 2}} \\
 &+ \underbrace{\sum_{t=1}^K \mathbb{E}_{s \sim \rho} \left[ \mathbb{1}\{\bar{\mathcal{E}}_k\} \left( \max_a f_0^k(s, a) - V_0^{\pi^{f^k}}(s) \right) \right]}_{\Gamma_1} + \underbrace{\sum_{k=1}^K \mathbb{E}_{s \sim \rho} \left[ \mathbb{1}\{\mathcal{E}_k\} \left( V_0^{\pi^e}(s) - \max_a f_0^k(s, a) \right) \right]}_{\Gamma_2} \\
 &+ \underbrace{\sum_{t=1}^T \mathbb{E}_{s \sim \rho} \left[ \mathbb{1}\{\mathcal{E}_k\} \left( \max_a f_0^k(s, a) - V_0^{\pi^{f^k}}(s) \right) \right]}_{\Gamma_3}.
 \end{aligned} \tag{B.14}$$

709 Let  $K_1 = \sum_{k=1}^K \mathbb{1}\{f_0^k(s, a) > Q^{\text{ref}}(s, a)\}$  and  $K_2 = \sum_{k=1}^K \mathbb{1}\{f_0^k(s, a) \leq Q^{\text{ref}}(s, a)\}$  (or equiva-  
 710 lently  $K_1 = \sum_{k=1}^K \mathbb{1}\{\bar{\mathcal{E}}_k\}$ ,  $K_2 = \sum_{k=1}^K \mathbb{1}\{\mathcal{E}_k\}$ ). For  $\Gamma_0$ , we have

$$\Gamma_0 = K_2 \mathbb{E}_{s \sim \rho} \left( V^{\pi^e}(s) - V^{\text{ref}}(s) \right). \tag{B.15}$$

711 For  $\Gamma_2$ , we have

$$\begin{aligned}
 \Gamma_2 &= \sum_{k=1}^K \mathbb{E}_{s \sim \rho} \left[ \mathbb{1}\{\mathcal{E}_k\} \left( V_0^{\pi^e}(s) - \max_a f_0^k(s, a) \right) \right] \\
 &\stackrel{(i)}{\leq} \sum_{k=1}^K \mathbb{1}\{\mathcal{E}_k\} \sum_{h=0}^{H-1} \mathbb{E}_{s, a \sim d_h^{\pi^e}} \left[ \mathcal{T} f_{h+1}^k(s, a) - f_h^k(s, a) \right] \\
 &\stackrel{(ii)}{\leq} \sum_{k=1}^K \left[ C_{\pi^e}^{\text{ref}} \cdot \mathbb{1}\{\mathcal{E}_k\} \sqrt{\sum_{h=0}^{H-1} \mathbb{E}_{s, a \sim \nu_h} \left[ (f_h^k(s, a) - \mathcal{T} f_{h+1}^k(s, a))^2 \right]} \right] \\
 &\stackrel{(iii)}{\leq} K_1 C_{\pi^e}^{\text{ref}} \sqrt{H \cdot \Delta_{\text{off}}},
 \end{aligned} \tag{B.16}$$

712 where  $\Delta_{\text{off}}$  is similarly defined as Song et al. [52] (See (C.3) of Lemma C.4). Inequality (i) holds  
 713 because of Lemma C.5, inequality (ii) holds by the definition of  $C_{\pi^e}^{\text{ref}}$  (Definition B.4), inequality (iii)  
 714 holds by applying Lemma C.4 with the function class satisfying Assumption B.1, and Definition B.4.  
 715 Note that the telescoping decomposition technique in the above equation also appears in [58, 24, 9].  
 716 Next, we will bound  $\Gamma_1 + \Gamma_3$ :

$$\begin{aligned}
 \Gamma_1 + \Gamma_3 &= \sum_{k=1}^K (\mathbb{1}\{\mathcal{E}_k\} + \mathbb{1}\{\bar{\mathcal{E}}_k\}) \mathbb{E}_{s \sim d_0} \left[ \max_a f_0^k(s, a) - V_0^{\pi^{f^k}}(s) \right] \\
 &\stackrel{(i)}{\leq} \sum_{k=1}^K (\mathbb{1}\{\mathcal{E}_k\} + \mathbb{1}\{\bar{\mathcal{E}}_k\}) \sum_{h=0}^{H-1} \left| \mathbb{E}_{s, a \sim d_h^{\pi^{f^k}}} \left[ f_h^k(s, a) - \mathcal{T} f_{h+1}^k(s, a) \right] \right| \\
 &\stackrel{(ii)}{=} \sum_{t=1}^K \left[ (\mathbb{1}\{\mathcal{E}_k\} + \mathbb{1}\{\bar{\mathcal{E}}_k\}) \sum_{h=0}^{H-1} \left| \langle X_h(f^k), W_h(f^k) \rangle \right| \right] \\
 &\stackrel{(iii)}{\leq} \sum_{k=1}^K \left[ (\mathbb{1}\{\mathcal{E}_k\} + \mathbb{1}\{\bar{\mathcal{E}}_k\}) \sum_{h=0}^{H-1} \|X_h(f^k)\|_{\Sigma_{k-1, h}^{-1}} \sqrt{\Delta_{\text{on}} + \lambda B_W^2} \right],
 \end{aligned} \tag{B.17}$$

where  $\Delta_{\text{on}}$  is similarly defined as Song et al. [52] (See (C.4) of Lemma C.4). Inequality (i) holds by Lemma C.6, equation (ii) holds by the definition of Bilinear model ((B.8) in Definition B.2), inequality (iii) holds by Lemma C.7 and Lemma C.4 with the function class satisfying Assumption B.1. Using Lemma C.8, we have that

$$\begin{aligned}
& \Gamma_1 + \Gamma_3 \\
& \leq \sum_{k=1}^K \left[ \left( \mathbb{1}\{\mathcal{E}_k\} + \mathbb{1}\{\bar{\mathcal{E}}_k\} \right) \sum_{h=0}^{H-1} \left\| X_h(f^k) \right\|_{\Sigma_{k-1;h}^{-1}} \sqrt{\Delta_{\text{on}} + \lambda B_W^2} \right] \\
& \stackrel{(i)}{\leq} H \sqrt{2d \log \left( 1 + \frac{K_1 B_X^2}{\lambda d} \right) \cdot (\Delta_{\text{on}} + \lambda B_W^2) \cdot K_1} + H \sqrt{2d_{\text{ref}} \log \left( 1 + \frac{K_2 B_X^2}{\lambda d_{\text{ref}}} \right) \cdot (\Delta_{\text{on}} + \lambda B_W^2) \cdot K_2} \\
& \stackrel{(ii)}{\leq} H \left( \sqrt{2d \log \left( 1 + \frac{K_1}{d} \right) \cdot (\Delta_{\text{on}} + B_X^2 B_W^2) \cdot K_1} + \sqrt{2d_{\text{ref}} \log \left( 1 + \frac{K_2}{d_{\text{ref}}} \right) \cdot (\Delta_{\text{on}} + B_X^2 B_W^2) \cdot K_2} \right), \tag{B.18}
\end{aligned}$$

where the first part of inequality (i) holds by the assumption that the underlying MDPs have bellman rank  $d$  (Definition B.2) when  $\mathcal{E}_k$  happens, and the second part of inequality (i) holds by the assumption that  $C_{\text{ref}}$  has bilinear rank  $d_{\text{ref}}$  (Assumption B.3)  $C_{\text{ref}}$  has bellman rank  $d_{\text{ref}}$  when  $\bar{\mathcal{E}}_k$  happens. Inequality (ii) holds by plugging in  $\lambda = B_X^2$ . Substituting (B.15), inequality B.16, and inequality (B.18) into (B.14), we have

$$\begin{aligned}
& \sum_{t=1}^K V^{\pi^e} - V^{\pi^{f^k}} \leq \Gamma_0 + \Gamma_2 + \Gamma_1 + \Gamma_3 \leq K_2 \left( V^{\pi^e}(s) - V^{\text{ref}}(s) \right) + K_1 C_{\pi^e}^{\text{ref}} \sqrt{H \cdot \Delta_{\text{off}}} \\
& + H \left( \sqrt{2d \log \left( 1 + \frac{K_1}{d} \right) \cdot (\Delta_{\text{on}} + B_X^2 B_W^2) \cdot K_1} + \sqrt{2d_{\text{ref}} \log \left( 1 + \frac{K_2}{d_{\text{ref}}} \right) \cdot (\Delta_{\text{on}} + B_X^2 B_W^2) \cdot K_2} \right) \tag{B.19}
\end{aligned}$$

Plugging in the values of  $\Delta_{\text{on}}, \Delta_{\text{off}}$  from (C.3) and (C.4), and using the subadditivity of the square root function, we have

$$\begin{aligned}
& \sum_{k=1}^K V^{\pi^e} - V^{\pi^{f^k}} \\
& \leq K_2 \left( V^{\pi^e}(s) - V^{\text{ref}}(s) \right) + 16V_{\text{max}} C_{\pi^e}^{\text{ref}} K_1 \sqrt{\frac{H}{m_{\text{off}}} \log \left( \frac{2HK_1|\mathcal{F}|}{\delta} \right)} \\
& + \left( 16V_{\text{max}} \sqrt{\frac{1}{m_{\text{on}}} \log \left( \frac{2HK_1|\mathcal{F}|}{\delta} \right)} + B_X B_W \right) \cdot H \sqrt{2dK_1 \log \left( 1 + \frac{K_1}{d} \right)} \\
& + \left( 16V_{\text{max}} \sqrt{\frac{1}{m_{\text{on}}} \log \left( \frac{2HK_2|\mathcal{F}|}{\delta} \right)} + B_X B_W \right) \cdot H \sqrt{2d_{\text{ref}} K_2 \log \left( 1 + \frac{K_2}{d_{\text{ref}}} \right)}. \tag{B.20}
\end{aligned}$$

Setting  $m_{\text{off}} = K, m_{\text{on}} = 1$  in the above equation completes the proof, we have

$$\begin{aligned}
& \sum_{k=1}^K V^{\pi^e} - V^{\pi^k} \\
& \leq \tilde{O} \left( C_{\pi^e}^{\text{ref}} \sqrt{HK_1 \log(|\mathcal{F}|/\delta)} \right) + \tilde{O} \left( H \sqrt{dK_1 \log(|\mathcal{F}|/\delta)} \right) \\
& + K_2 \left( V^{\pi^e}(s) - V^{\text{ref}}(s) \right) + \tilde{O} \left( H \sqrt{d_{\text{ref}} K_2 \log(|\mathcal{F}|/\delta)} \right) \tag{B.21} \\
& \leq \begin{cases} \tilde{O} \left( C_{\pi^e}^{\text{ref}} H \sqrt{dK_1 \log(|\mathcal{F}|/\delta)} \right) & \text{if } K_1 \gg K_2, \\ \tilde{O} \left( K_2 (V^{\pi^e} - V^{\text{ref}}) + H \sqrt{d_{\text{ref}} K_2 \log(|\mathcal{F}|/\delta)} \right) & \text{otherwise.} \end{cases} \\
& \leq \tilde{O} \left( \min \left\{ C_{\pi^e}^{\text{ref}} H \sqrt{dK \log(|\mathcal{F}|/\delta)}, K (V^{\pi^e} - V^{\text{ref}}) + H \sqrt{d_{\text{ref}} K \log(|\mathcal{F}|/\delta)} \right\} \right),
\end{aligned}$$

where the last inequality holds because  $K_1, K_2 \leq K$ , which completes the proof.  $\square$

## C Key Results of HyQ [52]

In this section, we restate the major theoretical results of Hy-Q [52] for completeness.

### C.1 Assumptions

**Assumption C.1** (Realizability and Bellman completeness). *For any  $h$ , we have  $Q_h^* \in \mathcal{F}_h$ , and additionally, for any  $f_{h+1} \in \mathcal{F}_{h+1}$ , we have  $\mathcal{T}f_{h+1} \in \mathcal{F}_h$ .*

**Definition C.2** (Bellman error transfer coefficient). *For any policy  $\pi$ , we define the transfer coefficient as*

$$C_\pi := \max \left\{ 0, \max_{f \in \mathcal{F}} \frac{\sum_{h=0}^{H-1} \mathbb{E}_{s,a \sim d_h^\pi} [\mathcal{T}f_{h+1}(s,a) - f_h(s,a)]}{\sqrt{\sum_{h=0}^{H-1} \mathbb{E}_{s,a \sim \nu_h} (\mathcal{T}f_{h+1}(s,a) - f_h(s,a))^2}} \right\}. \quad (\text{C.1})$$

### C.2 Main Theorem of Hy-Q

**Theorem C.3** (Theorem 1 of Song et al. [52]). *Fix  $\delta \in (0, 1)$ ,  $m_{\text{off}} = K$ ,  $m_{\text{on}} = 1$ , and suppose that the underlying MDP admits Bilinear rank  $d$  (Definition B.2), and the function class  $\mathcal{F}$  satisfies Assumption C.1. Then with probability at least  $1 - \delta$ , HyQ obtains the following bound on cumulative suboptimality w.r.t. any comparator policy  $\pi^e$ :*

$$\text{Reg}(K) = \tilde{O} \left( \max\{C_{\pi^e}, 1\} V_{\max} B_X B_W \sqrt{dH^2 K \cdot \log(|\mathcal{F}|/\delta)} \right). \quad (\text{C.2})$$

### C.3 Key Lemmas

#### C.3.1 Least Squares Generalization and Applications

**Lemma C.4** (Lemma 7 of Song et al. [52], Online and Offline Bellman Error Bound for FQI). *Let  $\delta \in (0, 1)$  and  $\forall h \in [H-1], k \in [K]$ , let  $f_h^{k+1}$  be the estimated value function for time step  $h$  computed via least square regression using samples in the dataset  $\{\mathcal{D}_h^0, \mathcal{D}_h^1, \dots, \mathcal{D}_h^T\}$  in (B.1) in the iteration  $t$  of Algorithm 2. Then with probability at least  $1 - \delta$ , for any  $h \in [H-1]$  and  $k \in [K]$ , we have*

$$\|f_h^{k+1} - \mathcal{T}f_{h+1}^{k+1}\|_{2, \nu_h}^2 \leq \frac{1}{m_{\text{off}}} 256 V_{\max}^2 \log(2HK|\mathcal{F}|/\delta) =: \Delta_{\text{off}} \quad (\text{C.3})$$

and

$$\sum_{\tau=1}^k \|f_h^{k+1} - \mathcal{T}f_{h+1}^{k+1}\|_{2, \mu_h^\tau}^2 \leq \frac{1}{m_{\text{on}}} 256 V_{\max}^2 \log(2HK|\mathcal{F}|/\delta) =: \Delta_{\text{on}}, \quad (\text{C.4})$$

where  $\nu_h$  denotes the offline data distribution at time  $h$ , and the distribution  $\mu_h^\tau \in \Delta(s, a)$  is defined such that  $s, a \sim d_h^{\pi^\tau}$ .

#### C.3.2 Bounding Offline Suboptimality via Performance Difference Lemma

**Lemma C.5** (Lemma 5 of Song et al. [52], performance difference lemma of w.r.t.  $\pi^e$ ). *Let  $\pi^e = (\pi_0^e, \dots, \pi_{H-1}^e)$  be a comparator policy and consider any value function  $f = (f_0, \dots, f_{H-1})$ , where  $f_h : \mathcal{S} \times \mathcal{A} \mapsto \mathbb{R}$ . Then we have*

$$\mathbb{E}_{s \sim d_0} \left[ V_0^{\pi^e}(s) - \max_a f_0(s, a) \right] \leq \sum_{i=1}^{H-1} \mathbb{E}_{s, a \sim d_i^{\pi^e}} [\mathcal{T}f_{i+1}(s, a) - f_i(s, a)], \quad (\text{C.5})$$

where we define  $f_H(s, a) = 0, \forall (s, a)$ .

#### C.3.3 Bounding Online Suboptimality via Performance Difference Lemma

**Lemma C.6** (Lemma 4 of Song et al. [52], performance difference lemma). *For any function  $f = (f_0, \dots, f_{H-1})$  where  $f_h : \mathcal{S} \times \mathcal{A} \mapsto \mathbb{R}$  and  $h \in [H-1]$ , we have*

$$\mathbb{E}_{s \sim d_0} \left[ \max_a f_0(s, a) - V_0^{\pi^f}(s) \right] \leq \sum_{h=0}^{H-1} \left| \mathbb{E}_{s, a \sim d_h^{\pi^f}} [f_h(s, a) - \mathcal{T}f_{h+1}(s, a)] \right|, \quad (\text{C.6})$$

where we define  $f_H(s, a) = 0, \forall s, a$ .



761 **Lemma C.7** (Lemma 8 of Song et al. [52], upper bounding bilinear class). *For any  $k \geq 2$  and*  
 762  *$h \in [H - 1]$ , we have*

$$|\langle W_h(f^k), X_h(f^k) \rangle| \leq \|X_h(f^k)\|_{\Sigma_{k-1;h}^{-1}} \sqrt{\sum_{i=1}^{k-1} \mathbb{E}_{s,a \sim d_h^{f^i}} [(f_h^k - \mathcal{T} f_{h+1}^k)^2]} + \lambda B_W^2, \quad (\text{C.7})$$

763 *where  $\Sigma_{k-1;h}$  is defined as (B.5) and we use  $d_h^{f^k}$  to denote  $d_h^{\pi_{f^k}}$ .*

764 **Lemma C.8** (Lemma 6 of Song et al. [52], bounding the inverse covariance norm). *Let*  
 765  *$X_h(f^1), \dots, X_h(f^K) \in \mathbb{R}^d$  be a sequence of vectors with  $\|X_h(f^k)\|_2 \leq B_X < \infty, \forall k \leq K$ .*  
 766 *Then we have*

$$\sum_{k=1}^K \|X_h(f^k)\|_{\Sigma_{k-1;h}^{-1}} \leq \sqrt{2dK \log \left( 1 + \frac{KB_X^2}{\lambda d} \right)}, \quad (\text{C.8})$$

767 *where we define  $\Sigma_{k;h} := \sum_{\tau=1}^k X_h(f^\tau) X_h(f^\tau)^T + \lambda \mathbf{I}$  and we assume  $\lambda \geq B_X^2$  holds  $\forall k \in [K]$ .*

## 768 D Environment Details

### 769 D.1 Antmaze

770 The Antmaze navigation tasks aim to control an 8-DoF ant quadruped robot to move from a starting  
 771 point to a desired goal in a maze. The agent will receive sparse +1/0 rewards depending on whether  
 772 it reaches the goal or not. We study each method on “medium” and “hard” (shown in Figure 5)  
 773 mazes which are difficult to solve, using the following datasets from D4RL [10]: large-diverse,  
 774 large-play, medium-diverse, and medium-play. The difference between “diverse” and “play”  
 775 datasets is the optimality of the trajectories they contain. The “diverse” datasets contain the trajectories  
 776 commanded to a random goal from random starting points, while the “play” datasets contain the  
 777 trajectories commanded to specific locations which are not necessarily the goal. We used an episode  
 778 length of 1000 for each task. For Cal-QL, CQL, and IQL, we pre-trained the agent using the offline  
 779 dataset for 1M steps. We then trained online fine-tuning for 1M environment steps for each method.

### 780 D.2 Franka Kitchen

781 The Franka Kitchen domain require controlling a 9-DoF Franka robot to arrange a kitchen environment  
 782 into a desired configuration. The configuration is decomposed into 4 subtasks, and the agent will  
 783 receive rewards of 0, +1, +2, +3, or +4 depending on how many subtasks it has managed to solve. To  
 784 solve the whole task and reach the desired configuration, it is important to learn not only how to solve  
 785 each subtask, but also to figure out the correct order to solve. We study this domain using datasets  
 786 with three different optimalities: kitchen-complete, kitchen-partial, and kitchen-mixed.  
 787 The “complete” dataset contains the trajectories of the robot performing the whole task completely.  
 788 The “partial” dataset partially contains some complete demonstrations, while others are incomplete  
 789 demonstrations solving the subtasks. The “mixed” dataset only contains incomplete data without any  
 790 complete demonstrations, which is hard and requires the highest degree of stitching and generalization  
 791 ability. We used an episode length of 1000 for each task. For Cal-QL, CQL, and IQL, we pre-trained  
 792 the agent using the offline dataset for 500K steps. We then performed online fine-tuning for 1.25M  
 793 environment steps for each method.

### 794 D.3 Adroit

795 The Adroit domain involves controlling a 24-DoF shadow hand robot. There are 3 tasks we consider  
 796 in this domain: pen-binary, relocate-binary, relocate-binary. These tasks comprise a  
 797 limited set of narrow human expert data distributions ( $\sim 25$ ) with additional trajectories collected by  
 798 a behavior-cloned policy. We truncated each trajectory and used the positive segments (terminate  
 799 when the positive reward signal is found) for all methods. This domain has a very narrow dataset  
 800 distribution and a large action space. In addition, learning in this domain is difficult due to the sparse  
 801 reward, which leads to exploration challenges. We utilized a variant of the dataset used in prior work  
 802 [44] to have a standard comparison with SOTA offline fine-tuning experiments that consider this  
 803 domain. For the offline learning phase, we pre-trained the agent for 20K steps. We then performed  
 804 online fine-tuning for 300K environment steps for the pen-binary task, and 1M environment steps  
 805 for the door-binary and relocate-binary tasks. The episode length is 100, 200, and 200 for  
 806 pen-binary, door-binary, and relocate-binary respectively.

## 807 D.4 Visual Manipulation Domain

808 The Visual Manipulation domain consists of a pick-and-place task. This task is a multitask formulation  
809 explored in the work, Pre-training for Robots (PTR) [33]. Here each task is defined as placing an  
810 object in a bin. A distractor object was present in the scene as an adversarial object which the agent  
811 had to avoid picking. There were 10 unique objects and no overlap between the task objects and  
812 the interfering/distractor objects. The episode length is 40. For the offline phase, we pre-trained the  
813 policy with offline data for 50K steps. We then performed online fine-tuning for 100K environment  
814 steps for each method, taking 5 gradient steps per environment step.

## 815 E Experiment Details

### 816 E.1 Normalized Scores

817 The visual-manipulation, adroit, and antmaze domains are all goal-oriented, sparse reward  
818 tasks. In these domains, we computed the normalized metric as simply the goal achieved rate for each  
819 method. For example, in the visual manipulation environment, if the object was placed successfully in  
820 the bin, a +1 reward was given to the agent and the task is completed. Similarly, for the door-binary  
821 task in the adroit tasks, we considered the success rate of opening the door. For the kitchen task, the  
822 task is to solve a series of 4 sub-tasks that need to be solved in an iterative manner. The normalized  
823 score is computed simply as  $\frac{\text{\#tasks solved}}{\text{total tasks}}$ .

### 824 E.2 Mixing Ratio Hyperparameter

825 In this work, we explore the mixing ratio parameter  $m$ , which is used during the online fine-tuning  
826 phase. The mixing ratio is either a value in the range  $[0, 1]$  or the value -1. If this mixing ratio is  
827 within  $[0, 1]$ , it represents what percentage of offline and online data is seen in each batch when  
828 fine-tuning. For example, if the mixing ratio  $m = 0.25$ , that means for each batch we sample 25%  
829 from the offline data and 75% from online data. Instead, if the mixing ratio is -1, the buffers are  
830 appended to each other and sampled uniformly.

### 831 E.3 Details and Hyperparameters for CQL and Cal-QL

832 We list the hyperparameters for CQL and Cal-QL in Table 3. We utilized a variant of Bellman backup  
833 that computes the target value by performing a maximization over target values computed for  $k$   
834 actions sampled from the policy at the next state, where we used  $k = 4$  in visual pick and place  
835 domain and  $k = 10$  in others. In the Antmaze domain, we used the dual version of CQL [32] and  
836 conducted ablations over the value of the threshold of the CQL regularizer  $\mathcal{R}(\theta)$  (target action gap)  
837 instead of  $\alpha$ . In the visual-manipulation domain which is not presented in the original paper, we  
838 swept over the alpha values of  $\alpha = 0.5, 1, 5, 10$ , and utilized separate  $\alpha$  values for offline ( $\alpha = 5$ )  
839 and online ( $\alpha = 0.5$ ) phases for the final results. We built our code upon the CQL implementation  
840 from <https://github.com/young-geng/JaxCQL> [14]. We used a single NVIDIA TITAN RTX  
841 chip to run each of our experiments.

### 842 E.4 Details and Hyperparameters for IQL

843 We list the hyperparameters for IQL in Table 4. To conduct our experiments, we used the of-  
844 ficial implementation of IQL provided by the authors [30], and primarily followed their recom-  
845 mended parameters, which they previously ablated over in their work. In the visual-manipulation  
846 domain which is not presented in the original paper, we performed a parameter sweep over expect-  
847 tile  $\tau = 0.5, 0.6, 0.7, 0.8, 0.9, 0.95, 0.99$  and temperature  $\beta = 1, 3, 5, 10, 25, 50$  and selected the  
848 best-performing values of  $\tau = 0.7$  and  $\beta = 10$  for our final results. In addition, as the second  
849 best-performing method in the visual-manipulation domain, we also attempted to use separate  $\beta$   
850 values for IQL, for a fair comparison with CQL and Cal-QL. However, we found that it has little to  
851 no effect, as shown in Figure 9.

### 852 E.5 Details and Hyperparameters for AWAC and ODT

853 We used the JAX implementation of AWAC from <https://github.com/ikostrikov/jaxrl> [29].  
854 We primarily followed the author’s recommended parameters, where we used the Lagrange multiplier  
855  $\lambda = 1.0$  for the Antmaze and Franka Kitchen domains, and  $\lambda = 0.3$  for the Adroit domain. In

the visual-manipulation domain, we performed a parameter sweep over  $\lambda = 0.1, 0.3, 1, 3, 10$  and selected the best-performing value of  $\lambda = 1$  for our final results. For ODT, we used the author’s official implementation from <https://github.com/facebookresearch/online-dt>, with the author’s recommended parameters they used in the Antmaze domain. In addition, in support of our result of AWAC and ODT (as shown in Table 1), the poor performance of Decision Transformers and AWAC in the Antmaze domain can also be observed in Table 1 and Table 2 of the IQL paper [30].

## E.6 Details and Hyperparameters for SAC, SAC + Offline Data, Hybrid RL and CQL + SAC

We used the standard hyperparameters for SAC as derived from the original implementation in [19]. We used the same other hyperparameters as CQL and Cal-QL. We used automatic entropy tuning for the policy and critic entropy terms, with a target entropy of the negative action dimension. For SAC, the agent is only trained with the online explored data. For SAC + Offline Data, the offline data and online explored data is combined together and sampled uniformly. For Hybrid RL, we use the same mixing ratio used for CQL and Cal-QL presented in Table 3. For CQL + SAC, we first pre-train with CQL and then run online fine-tuning using both offline and online data, also using the same mixing ratio presented in Table 3.

Table 3: CQL, Cal-QL Hyperparameters

| Hyperparameters   | Adroit               | Kitchen               | Antmaze | Manipulation               |
|-------------------|----------------------|-----------------------|---------|----------------------------|
| $\alpha$          | 1                    | 5                     | -       | 5 (online: 0.5)            |
| target action gap | -                    | -                     | 0.8     | -                          |
| mixing ratio      | -1, 0.25, <b>0.5</b> | -1, <b>0.25</b> , 0.5 | 0.5     | 0.2, <b>0.5</b> , 0.7, 0.9 |

Table 4: IQL Hyperparameters

| Hyperparameters     | Adroit               | Kitchen               | Antmaze | Manipulation               |
|---------------------|----------------------|-----------------------|---------|----------------------------|
| expectile $\tau$    | 0.8                  | 0.7                   | 0.9     | 0.7                        |
| temperature $\beta$ | 3                    | 0.5                   | 10      | 10                         |
| mixing ratio        | -1, <b>0.2</b> , 0.5 | -1, <b>0.25</b> , 0.5 | 0.5     | 0.2, <b>0.5</b> , 0.7, 0.9 |

## F Extended Discussion on Limitations of Existing Fine-Tuning Methods

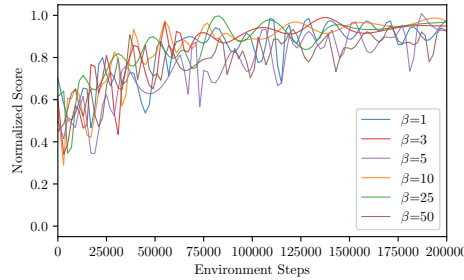

Figure 9: **Abalation on IQL’s online temperature values:** The change in the temperature  $\beta$  used in online fine-tuning phase has little to no effect on the sample efficiency.

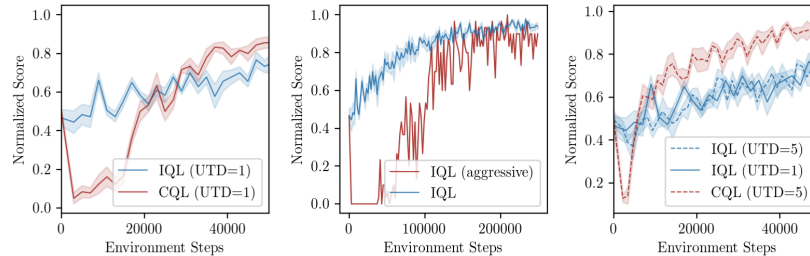

Figure 10: **IQL and CQL:** Step 0 on the x-axis is the performance after offline pre-training. Observe while CQL suffers from initial policy unlearning, IQL improves slower throughout fine-tuning.

In this section, we aim to highlight some potential reasons behind the slow improvement of other methods in our empirical analysis experiment in Section 4.1, and specifically, we use IQL for the analysis. We first swept over the temperature  $\beta$  values used in the online fine-tuning phase for IQL, which controls the constraint on how closely the learned policy should match the behavior policy. As shown in Figure 9, the change in the temperature  $\beta$  has little to no effect on the sample efficiency. Another natural hypothesis is that IQL improves slowly because we are not making enough updates per unit of data collected by the environment. To investigate this, we ran IQL with (a) five times as many gradient steps per step of data collection (UTD = 5), and (b) with a more aggressive policy update. Observe in Figure 10 that (a) does not improve the asymptotic performance of IQL, although it does improve CQL meaning that there is room for improvement on this task by making more gradient updates. Observe in Figure 10 that (b) often induces policy unlearning, similar to the failure mode in CQL. These two observations together indicate that a policy constraint approach can slow down learning asymptotically, and we cannot increase the speed by making more aggressive updates as this causes the policy to find erroneously optimistic out-of-distribution actions, and unlearn the policy learned from offline data.

## G Impact of Estimation Errors in the Reference Value Function

In our experiments, we compute the reference value functions using Monte-Carlo return estimates. However, this may not be available in all tasks. How does Cal-QL behave when reference value functions must be estimated using the offline dataset itself? To answer this, we ran an experiment on the kitchen domain, where instead of using an estimate for  $Q^\mu$  based on the Monte-Carlo return, we train a neural network function approximator  $Q_\theta^\mu$  to approximate  $Q^\mu$  via supervised regression on to Monte-Carlo return, which is then utilized by Cal-QL. Observe in Figure 11, that the performance of Cal-QL largely remains unaltered. This implies as long as we can obtain a reasonable function approximator to estimate the Q-function of the reference policy (in this case, the behavior policy), errors in the reference Q-function do not affect the performance of Cal-QL significantly.

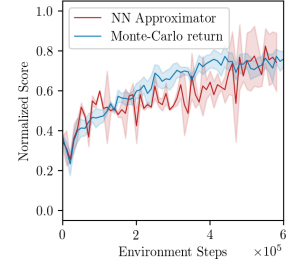

Figure 11: The performance of Cal-QL using a neural net approximator for the reference value function is comparable to using the Monte-Carlo return.

## H Initial Unlearning of CQL on Multiple Tasks

In this section, we show the learning curves of CQL and Cal-QL from Figure 6 and zoom in on the x-axis to provide a clearer visualization of CQL’s initial unlearning in the Franka Kitchen, Adroit, and the visual-manipulation domains. As depicted in Figure 12, it is evident across all tasks that while CQL experiences initial unlearning, Cal-QL can effectively mitigate it and quickly recovers its performance. Regarding the Antmaze domain, as we discussed in section 7.3, CQL does not exhibit initial unlearning since the default dataset has a high coverage of data. However, we can observe a similar phenomenon if we narrow down the dataset distribution (as shown in Figure 8).

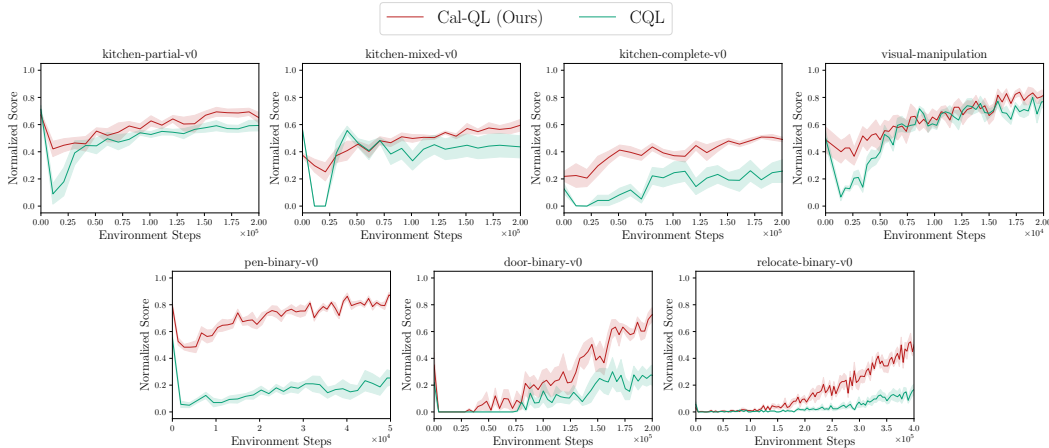

Figure 12: While CQL experiences initial unlearning, Cal-QL effectively mitigates it and quickly recovers its performance.
